# Supplementary material for: Functional annotation of human cytomegalovirus gene products: an update
Source: PubMed Central journal article supplement (PMC4032930; doi:10.3389/fmicb.2014.00218), 2014-05-19
Supplement: DataSheet1.pdf [file DataSheet1.pdf]

| Gene | Growth           | Kinetics                                                      | Uniprot entry          | Function keyword                             | Process/protein/gene family                                                                   | Reference                                 |
|------|------------------|---------------------------------------------------------------|------------------------|----------------------------------------------|-----------------------------------------------------------------------------------------------|-------------------------------------------|
| RL1  | D <sup>a,b</sup> | N/A                                                           | <a href="#">Q6SWD5</a> | Unknown                                      |                                                                                               |                                           |
| RL2  | D <sup>a,b</sup> | E (Chambers et al., 1999)                                     | N/A                    | Latency*                                     |                                                                                               | (Goodrum et al., 2002)                    |
| RL4  | D <sup>a,b</sup> | E (Mocarski Jr, 1996;Chambers et al., 1999;Dunn et al., 2003) | N/A                    | Cell tropism/Cell type-specific replication* | May be involved in cell tropism epithelial cells                                              | (Womack, 2011)                            |
| RL4  | D <sup>a,b</sup> | E (Mocarski Jr, 1996;Chambers et al., 1999;Dunn et al., 2003) | N/A                    | Latency*                                     |                                                                                               | (Goodrum et al., 2002)                    |
| RL5A | N/A              | E (Hutchinson et al., 1986)                                   | <a href="#">F5HF23</a> | Unknown                                      | RL11 family <sup>†</sup>                                                                      |                                           |
| RL6  | D <sup>a,b</sup> | L (Chambers et al., 1999); E/L (Hutchinson et al., 1986)      | <a href="#">Q6SWD3</a> | Latency*                                     | RL11 family <sup>†</sup>                                                                      | (Goodrum et al., 2002)                    |
| RL8A | N/A              | N/A                                                           | <a href="#">F7V995</a> | Unknown                                      |                                                                                               |                                           |
| RL9A | N/A              | N/A                                                           | <a href="#">F7V996</a> | Unknown                                      |                                                                                               |                                           |
| RL9  | D <sup>a,b</sup> | L (Chambers et al., 1999)                                     | N/A                    | Unknown                                      |                                                                                               |                                           |
| RL10 | D <sup>a,b</sup> | E/L (Chambers et al., 1999)                                   | <a href="#">F5HI32</a> | Virion protein                               | Envelope protein <sup>†</sup><br>Glycoprotein                                                 | (Apweiler et al., 2004;Mocarski Jr, 2007) |
| RL11 | D <sup>a,b</sup> | L (Chambers et al., 1999)                                     | <a href="#">Q6SWD1</a> | Immunomodulation*                            | IgG Fc-binding capacity <sup>†</sup><br>Glycoprotein <sup>†</sup><br>RL11 family <sup>†</sup> | (Mocarski Jr, 2007)                       |
| RL12 | D <sup>a,b</sup> | E/L (Chambers et al., 1999)                                   | <a href="#">Q6SWD0</a> | Virion protein*                              | Putative membrane glycoprotein <sup>†</sup><br>RL11 family <sup>†</sup>                       | (Apweiler et al., 2004;Mocarski Jr, 2007) |
| RL12 | D <sup>a,b</sup> | E/L (Chambers et                                              | <a href="#">Q6SWD0</a> | Immunomodulation*                            | IgG Fc-binding                                                                                | (Cortese et al.,                          |

|            |                                      |                             |                        |                                              |                                                                                                     |                                               |
|------------|--------------------------------------|-----------------------------|------------------------|----------------------------------------------|-----------------------------------------------------------------------------------------------------|-----------------------------------------------|
|            |                                      | al., 1999)                  |                        |                                              | capacity <sup>†</sup><br>Putative membrane<br>glycoprotein <sup>†</sup><br>RL11 family <sup>†</sup> | 2012)                                         |
| RL13/TRL14 | D <sup>a,b</sup>                     | E/L (Chambers et al., 1999) | <a href="#">Q6SWC9</a> | Cell tropism/Cell type-specific replication* | May be involved in cell tropism<br>Glycoprotein<br>RL11 family <sup>†</sup>                         | (Stanton et al., 2010)                        |
| RL13/TRL14 | D <sup>a,b</sup>                     | E/L (Chambers et al., 1999) | <a href="#">Q6SWC9</a> | Virion protein                               | Glycoprotein                                                                                        | (Apweiler et al., 2004; Stanton et al., 2010) |
| RL13/TRL14 | D <sup>a,b</sup>                     | E/L (Chambers et al., 1999) | <a href="#">Q6SWC9</a> | Immunomodulation*                            | IgG Fc-binding glycoprotein                                                                         | (Cortese et al., 2012)                        |
| RL13/TRL14 | D <sup>a,b</sup>                     | E/L (Chambers et al., 1999) | <a href="#">Q6SWC9</a> | (DNA) Replication                            | RL13 repressed replication in multiple cell types<br>Glycoprotein                                   | (Stanton et al., 2010)                        |
| UL1        | D <sup>b</sup>                       | E/L (Chambers et al., 1999) | <a href="#">Q6SWC8</a> | Virion protein                               | Glycoprotein<br>RL11 family <sup>†</sup>                                                            | (Apweiler et al., 2004)                       |
| UL1        | D <sup>b</sup>                       | E/L (Chambers et al., 1999) | <a href="#">Q6SWC8</a> | Cell tropism/Cell type-specific replication* | May be involved in cell tropism in epithelial cells<br>Glycoprotein<br>RL11 family <sup>†</sup>     | (Shikhagaie et al., 2012)                     |
| UL1        | D <sup>b</sup>                       | E/L (Chambers et al., 1999) | <a href="#">Q6SWC8</a> | Assembly/Maturation/Egress*                  | Localized at the cytoplasmic site of virion assembly and secondary envelopment<br>Glycoprotein      | (Shikhagaie et al., 2012)                     |
| UL2        | MGD <sup>a</sup> /<br>D <sup>b</sup> | L (Chambers et al., 1999)   | <a href="#">Q6SWC7</a> | Unknown                                      | Putative membrane protein <sup>†</sup>                                                              |                                               |
| UL3        | D <sup>a,b</sup>                     | L (Chambers et al., 1999)   | <a href="#">A8T755</a> | Unknown                                      |                                                                                                     |                                               |

|      |                                 |                                             |                        |                  |                                                                                                                   |                                            |
|------|---------------------------------|---------------------------------------------|------------------------|------------------|-------------------------------------------------------------------------------------------------------------------|--------------------------------------------|
| UL4  | D <sup>a,b</sup>                | E (Mocarski Jr, 1996;Chambers et al., 1999) | <a href="#">Q6SWC6</a> | Virion protein   | Glycoprotein <sup>†</sup><br>RL11 family <sup>†</sup>                                                             | (Chang et al., 1989;Apweiler et al., 2004) |
| UL4  | D <sup>a,b</sup>                | E (Mocarski Jr, 1996;Chambers et al., 1999) | <a href="#">Q6SWC6</a> | Latency*         | Glycoprotein <sup>†</sup><br>RL11 family <sup>†</sup>                                                             | (Goodrum et al., 2002)                     |
| UL5  | D <sup>a,b</sup>                | E (Chambers et al., 1999)                   | <a href="#">Q6SWC5</a> | Virion protein   | Virion membrane protein <sup>†</sup><br>RL11 family <sup>†</sup>                                                  | (Mocarski Jr, 2007)                        |
| UL5  | D <sup>a,b</sup>                | E (Chambers et al., 1999)                   | <a href="#">Q6SWC5</a> | Latency*         | Virion membrane protein <sup>†</sup><br>RL11 family <sup>†</sup>                                                  | (Goodrum et al., 2002)                     |
| UL6  | D <sup>a,b</sup>                | N/A                                         | <a href="#">Q6SWC4</a> | Unknown          | Putative membrane glycoprotein <sup>†</sup><br>RL11 family <sup>†</sup>                                           |                                            |
| UL7  | D <sup>a,b</sup>                | L (Chambers et al., 1999)                   | <a href="#">Q6SWC3</a> | Immunomodulation | Modulation chemo- and/or cytokines<br>Mediation immune cell adhesion<br>Glycoprotein<br>RL11 family <sup>†</sup>  | (Apweiler et al., 2004;Engel et al., 2011) |
| UL8  | D <sup>a,b</sup>                | N/A                                         | <a href="#">Q6SWC2</a> | Unknown          | Putative membrane glycoprotein <sup>†</sup><br>RL11 family <sup>†</sup>                                           |                                            |
| UL9  | EG <sup>a</sup> /D <sup>b</sup> | L (Chambers et al., 1999)                   | <a href="#">F5H9T4</a> | Viral growth     | Temperance in fibroblasts <sup>†</sup><br>Putative membrane glycoprotein <sup>†</sup><br>RL11 family <sup>†</sup> | (Mocarski Jr, 2007)                        |
| UL10 | D <sup>a,b</sup>                | N/A                                         | <a href="#">Q6SWC0</a> | Viral growth     | Temperance in RPE <sup>†</sup><br>Putative membrane glycoprotein <sup>†</sup><br>RL11 family <sup>†</sup>         | (Mocarski Jr, 2007)                        |

|       |                                      |                                                      |                        |                  |                                                                                                        |                                                                                                    |
|-------|--------------------------------------|------------------------------------------------------|------------------------|------------------|--------------------------------------------------------------------------------------------------------|----------------------------------------------------------------------------------------------------|
| UL11  | MGD <sup>a</sup> /<br>D <sup>b</sup> | E (Hitomi et al., 1997)                              | <a href="#">Q6SWB9</a> | Immunomodulation | Modulation T-cell signaling/function<br>Membrane glycoprotein <sup>†</sup><br>RL11 family <sup>†</sup> | (Gabaev et al., 2011)                                                                              |
| UL12  | MGD <sup>a</sup> /<br>D <sup>b</sup> | N/A                                                  | <a href="#">A8T769</a> | Unknown          |                                                                                                        |                                                                                                    |
| UL13  | D <sup>a,b</sup>                     | E (Chambers et al., 1999); IE/L (Wang et al., 2013b) | <a href="#">Q6SWB8</a> | Unknown          | Putative secreted protein <sup>†</sup>                                                                 |                                                                                                    |
| UL14  | MGD <sup>a</sup> /<br>D <sup>b</sup> | L (Chambers et al., 1999)                            | <a href="#">Q6SWB7</a> | Unknown          | Putative membrane glycoprotein <sup>†</sup><br>UL14 family <sup>†</sup>                                |                                                                                                    |
| UL15A | D <sup>b</sup>                       | N/A                                                  | <a href="#">F5HAE6</a> | Unknown          | Putative membrane protein <sup>†</sup>                                                                 |                                                                                                    |
| UL15  | D <sup>a</sup>                       | L (Chambers et al., 1999)                            | N/A                    | Unknown          |                                                                                                        |                                                                                                    |
| UL16  | D <sup>a,b</sup>                     | E (Kaye et al., 1992)                                | <a href="#">F5HG68</a> | Immunomodulation | Modulation NK cell signaling/function<br>Membrane glycoprotein <sup>†</sup>                            | (Cosman et al., 2001;Dunn et al., 2003;Odeberg et al., 2003;Mocarski Jr, 2007;Muller et al., 2010) |
| UL16  | D <sup>a,b</sup>                     | E (Kaye et al., 1992)                                | <a href="#">F5HG68</a> | Viral growth     | Temperance in fibroblasts <sup>†</sup>                                                                 | (Mocarski Jr, 2007)                                                                                |
| UL17  | D <sup>a,b</sup>                     | E (Chambers et al., 1999)                            | <a href="#">F5HHT4</a> | Latency*         |                                                                                                        | (Goodrum et al., 2002)                                                                             |

|                  |                                      |                                                       |                                                     |                                                 |                                                                                                                                     |                                                                                                                            |
|------------------|--------------------------------------|-------------------------------------------------------|-----------------------------------------------------|-------------------------------------------------|-------------------------------------------------------------------------------------------------------------------------------------|----------------------------------------------------------------------------------------------------------------------------|
| UL18             | D <sup>a,b</sup>                     | L (Hassan-Walker et al., 1998; Chambers et al., 1999) | <a href="#">F5HFB4</a>                              | Immunomodulation                                | MHC-I homologue<br>Modulation NK cell signaling/function<br>Putative membrane glycoprotein <sup>†</sup><br>UL18 family <sup>†</sup> | (Chapman et al., 1999; Vitale et al., 1999; Dunn et al., 2003; Apweiler et al., 2004; Mocarski Jr, 2007; Kim et al., 2008) |
| UL19             | D <sup>a,b</sup>                     | N/A                                                   | <a href="#">F5HI68</a>                              | Unknown                                         |                                                                                                                                     |                                                                                                                            |
| UL20             | MGD <sup>a</sup> /<br>D <sup>b</sup> | E (Jelcic et al., 2011)                               | <a href="#">F5H9Z4</a>                              | Immunomodulation*                               | Modulation T-cell signaling/function*                                                                                               | (Beck and Barrell, 1991; Mocarski Jr, 2007)                                                                                |
| UL21             | SGD <sup>a</sup>                     | L (Chambers et al., 1999)                             | <a href="#">P16759</a><br>( <a href="#">AD169</a> ) | Unknown                                         |                                                                                                                                     |                                                                                                                            |
| UL21.5/UL2<br>1A | EG <sup>a</sup> /G<br>D <sup>b</sup> | E (Fehr and Yu, 2010)                                 | <a href="#">F5HH39</a>                              | Modulation of host cell cycle/protein synthesis | Degradation of cyclin A (primate CMV)                                                                                               | (Apweiler et al., 2004; Caffarelli et al., 2013)                                                                           |
| UL21.5/UL2<br>1A | EG <sup>a</sup> /G<br>D <sup>b</sup> | E (Fehr and Yu, 2010)                                 | <a href="#">F5HH39</a>                              | Viral growth                                    | Temperance in fibroblasts <sup>†</sup>                                                                                              | (Mocarski Jr, 2007)                                                                                                        |
| UL21.5/UL2<br>1A | EG <sup>a</sup> /G<br>D <sup>b</sup> | E (Fehr and Yu, 2010)                                 | <a href="#">F5HH39</a>                              | (DNA) replication                               | Facilitates DNA synthesis                                                                                                           | (Mocarski Jr, 2007; Fehr and Yu, 2010; 2011)                                                                               |
| UL21.5/UL2<br>1A | EG <sup>a</sup> /G<br>D <sup>b</sup> | E/L (Boriskin and Butcher, 2001)                      | <a href="#">F5HF91</a>                              | Immunomodulation                                | Modulation chemo- and/or cytokines                                                                                                  | (Mocarski Jr, 2007)                                                                                                        |
| UL22A            | N/A                                  | N/A                                                   | <a href="#">F5HF90</a>                              | Immunomodulation*                               | Possible role on DCs<br>Secreted glycoprotein <sup>†</sup>                                                                          | (Raftery et al., 2009)                                                                                                     |
| UL22A            | N/A                                  | N/A                                                   | <a href="#">F5HF90</a>                              | Virion protein                                  | Secreted glycoprotein <sup>†</sup>                                                                                                  | (Apweiler et al., 2004; Mocarski Jr, 2007)                                                                                 |
| UL22             | N/A                                  | L (Andre et al., 1999)                                | N/A                                                 | Unknown                                         |                                                                                                                                     |                                                                                                                            |
| UL23             | EG <sup>a</sup> /D <sup>b</sup>      | E/L (Adair et al., 2002)                              | <a href="#">F5HDM3</a>                              | Viral growth                                    | Temperance in fibroblasts <sup>†</sup><br>Tegument protein <sup>†</sup><br>US22 family <sup>†</sup>                                 | (Mocarski Jr, 2007)                                                                                                        |

|      |                                   |                                                           |                        |                                             |                                                                                                            |                                                                                        |
|------|-----------------------------------|-----------------------------------------------------------|------------------------|---------------------------------------------|------------------------------------------------------------------------------------------------------------|----------------------------------------------------------------------------------------|
| UL23 | EG <sup>a</sup> /D <sup>b</sup>   | E/L (Adair et al., 2002)                                  | <a href="#">F5HDM3</a> | Virion protein                              | Tegument protein <sup>†</sup><br>US22 family <sup>†</sup>                                                  | (Dunn et al., 2003; Apweiler et al., 2004; Mocarski Jr, 2007)                          |
| UL24 | D <sup>a,b</sup>                  | E/L (Adair et al., 2002)                                  | <a href="#">F5H9N4</a> | Virion protein                              | Tegument protein <sup>†</sup><br>US22 family <sup>†</sup>                                                  | (Dunn et al., 2003; Apweiler et al., 2004; Mocarski Jr, 2007)                          |
| UL24 | D <sup>a,b</sup>                  | E/L (Adair et al., 2002)                                  | <a href="#">F5H9N4</a> | Cell tropism/Cell type-specific replication | Involved in cell tropism in endothelial cells<br>Tegument protein <sup>†</sup><br>US22 family <sup>†</sup> | (Dunn et al., 2003; Mocarski Jr, 2007)                                                 |
| UL25 | D <sup>a,b</sup>                  | L (Baldick and Shenk, 1996; Battista et al., 1999)        | <a href="#">F5HGJ4</a> | Virion protein                              | Tegument phosphoprotein <sup>†</sup><br>UL25 family <sup>†</sup>                                           | (Baldick and Shenk, 1996; Dunn et al., 2003; Apweiler et al., 2004; Mocarski Jr, 2007) |
| UL26 | SGD <sup>a</sup> /GD <sup>b</sup> | E (Chambers et al., 1999); IE/E (Stamminger et al., 2002) | <a href="#">F5HGG3</a> | Virion protein                              | Tegument protein <sup>†</sup><br>US22 family <sup>†</sup>                                                  | (Baldick and Shenk, 1996; Dunn et al., 2003; Apweiler et al., 2004; Mocarski Jr, 2007) |
| UL26 | SGD <sup>a</sup> /GD <sup>b</sup> | E (Chambers et al., 1999); IE/E (Stamminger et al., 2002) | <a href="#">F5HGG3</a> | Gene expression/regulation                  | Activator of MIEP <sup>†</sup><br>Tegument protein <sup>†</sup><br>US22 family <sup>†</sup>                | (Baldick and Shenk, 1996; Dunn et al., 2003; Mocarski Jr, 2007)                        |
| UL26 | SGD <sup>a</sup> /GD <sup>b</sup> | E (Chambers et al., 1999); IE/E (Stamminger et al., 2002) | <a href="#">F5HGG3</a> | Virion stability                            |                                                                                                            | (Kalejta, 2008)                                                                        |
| UL27 | D <sup>a</sup> /GD <sup>b</sup>   | E (Chambers et al., 1999)                                 | Q6SWA4                 | Unknown                                     | Maribavir resistance <sup>†</sup>                                                                          |                                                                                        |

|              |                                       |                                                      |                        |                                             |                                                                                        |                                                                           |
|--------------|---------------------------------------|------------------------------------------------------|------------------------|---------------------------------------------|----------------------------------------------------------------------------------------|---------------------------------------------------------------------------|
| UL28         | SGD <sup>a</sup> /<br>GD <sup>b</sup> | E (Mitchell et al., 2009)                            | <a href="#">P16847</a> | Gene expression/regulation                  | Activator of MIEP (via NuRD complex)<br>US22 family <sup>†</sup>                       | (Mitchell et al., 2009;Terhune et al., 2010)                              |
| UL28         | SGD <sup>a</sup> /<br>GD <sup>b</sup> | E (Mitchell et al., 2009)                            | <a href="#">P16847</a> | Apoptosis                                   | Regulation of p53<br>US22 family <sup>†</sup>                                          | (Savaryn et al., 2013)                                                    |
| UL28         | SGD <sup>a</sup> /<br>GD <sup>b</sup> | E (Mitchell et al., 2009)                            | <a href="#">P16847</a> | Latency*                                    | US22 family <sup>†</sup>                                                               | (Rossetto et al., 2013)                                                   |
| UL29         | MGD <sup>a</sup> /<br>GD <sup>b</sup> | L (Chambers et al., 1999); E (Mitchell et al., 2009) | <a href="#">Q6SWA3</a> | Virion protein*                             | US22 family <sup>†</sup>                                                               | (Apweiler et al., 2004)                                                   |
| UL29         | MGD <sup>a</sup> /<br>GD <sup>b</sup> | L (Chambers et al., 1999); E (Mitchell et al., 2009) | <a href="#">Q6SWA3</a> | Gene expression/regulation                  | Activator of MIEP (via NuRD complex)<br>US22 family <sup>†</sup>                       | (Mitchell et al., 2009;Terhune et al., 2010)                              |
| UL29         | MGD <sup>a</sup> /<br>GD <sup>b</sup> | L (Chambers et al., 1999); E (Mitchell et al., 2009) | <a href="#">Q6SWA3</a> | Apoptosis                                   | Regulation of p53<br>US22 family <sup>†</sup>                                          | (Savaryn et al., 2013)                                                    |
| UL29         | MGD <sup>a</sup> /<br>GD <sup>b</sup> | L (Chambers et al., 1999); E (Mitchell et al., 2009) | <a href="#">Q6SWA3</a> | Cell tropism/Cell type-specific replication | Involved in cell tropism in endothelial cells <sup>†</sup><br>US22 family <sup>†</sup> | (Mocarski Jr, 2007;Savaryn et al., 2013)                                  |
| UL30         | SGD <sup>a</sup> /<br>GD <sup>b</sup> | L (Ma et al., 2014)                                  | <a href="#">F5HGC2</a> | Latency*                                    |                                                                                        | (Goodrum et al., 2002)                                                    |
| UL31         | MGD <sup>a</sup> /<br>D <sup>b</sup>  | L (Chambers et al., 1999; Ma et al., 2014)           | <a href="#">Q6SWA0</a> | Gene expression/regulation                  | Phosphoprotein                                                                         | (Chang and Roizman, 1993;Dunn et al., 2003)                               |
| UL32 (pp150) | E <sup>a,b</sup>                      | L (Mocarski Jr, 1996;Chambers et al., 1999)          | <a href="#">Q6SW99</a> | Virion protein                              | Major tegument protein <sup>†</sup>                                                    | (Dunn et al., 2003;Apweiler et al., 2004;Mocarski Jr, 2007;Kalejta, 2008) |

|                           |                  |                                                                         |                        |                                                 |                                                                                                                                             |                                                |
|---------------------------|------------------|-------------------------------------------------------------------------|------------------------|-------------------------------------------------|---------------------------------------------------------------------------------------------------------------------------------------------|------------------------------------------------|
| UL32<br>(pp150)           | E <sup>a,b</sup> | L (Mocarski Jr, 1996; Chambers et al., 1999)                            | <a href="#">Q6SW99</a> | Cellular trafficking                            | Transport capsid to nucleus post entry<br>Major tegument protein <sup>†</sup>                                                               | (Mocarski Jr, 2007; Kalejta, 2008)             |
| UL32<br>(pp150)           | E <sup>a,b</sup> | L (Mocarski Jr, 1996; Chambers et al., 1999)                            | <a href="#">Q6SW99</a> | Assembly/Maturation/Egress                      | Final envelopment/egress<br>Major tegument protein <sup>†</sup>                                                                             | (AuCoin et al., 2006)                          |
| UL32<br>(pp150)           | E <sup>a,b</sup> | L (Mocarski Jr, 1996; Chambers et al., 1999)                            | <a href="#">Q6SW99</a> | Gene expression/regulation                      | Regulator of IE gene expression<br>Major tegument protein <sup>†</sup>                                                                      | (Bogdanow et al., 2013)                        |
| UL32<br>(pp150)           | E <sup>a,b</sup> | L (Mocarski Jr, 1996; Chambers et al., 1999)                            | <a href="#">Q6SW99</a> | Modulation of host cell cycle/protein synthesis | Sensor of the host cell cycle and differentiation state<br>Major tegument protein <sup>†</sup>                                              | (Bogdanow et al., 2013)                        |
| UL32<br>(pp150)           | E <sup>a,b</sup> | L (Mocarski Jr, 1996; Chambers et al., 1999)                            | <a href="#">Q6SW99</a> | Latency*                                        | Major tegument protein <sup>†</sup>                                                                                                         | (Goodrum et al., 2002)                         |
| UL33<br>(UL33.1 & UL33.2) | D <sup>a,b</sup> | E (Chambers et al., 1999); L (Mocarski Jr, 1996; Tadagaki et al., 2012) | <a href="#">Q6SW98</a> | Immunomodulation                                | Modulation of chemo- and/or cytokine receptor through binding (CCR5/CXCR4)<br>Envelope protein <sup>†</sup><br>GPCR-7TM family <sup>†</sup> | (Apweiler et al., 2004; Tadagaki et al., 2012) |
| UL33<br>(UL33.1 & UL33.2) | D <sup>a,b</sup> | E (Chambers et al., 1999); L (Mocarski Jr, 1996; Tadagaki et al., 2012) | <a href="#">Q6SW98</a> | Virion protein                                  | Envelope protein <sup>†</sup><br>GPCR-7TM family <sup>†</sup>                                                                               | (Mocarski Jr, 2007)                            |



|                              |                                      |                                                                           |                        |                                                 |                                                                                                              |                                                     |
|------------------------------|--------------------------------------|---------------------------------------------------------------------------|------------------------|-------------------------------------------------|--------------------------------------------------------------------------------------------------------------|-----------------------------------------------------|
| UL33<br>(UL33.1 &<br>UL33.2) | D <sup>a,b</sup>                     | E (Chambers et al., 1999); L (Mocarski Jr, 1996; Tadagaki et al., 2012)   | <a href="#">Q6SW98</a> | Modulation of host cell cycle/protein synthesis | Envelope protein <sup>†</sup><br>GPCR-7TM family <sup>†</sup>                                                | (Mocarski Jr, 2007)                                 |
| UL34                         | E <sup>a,b</sup>                     | E/L (Chambers et al., 1999); E and L (2 proteins) (Biegelke et al., 2004) | <a href="#">F5HC16</a> | Gene expression/regulation                      | US3 regulator (repressor) <sup>†</sup>                                                                       | (Mocarski Jr, 2007)                                 |
| UL35                         | MGD <sup>a</sup> /<br>D <sup>b</sup> | E (Chambers et al., 1999); E and L (2 proteins)(Liu and Biegelke, 2002)   | <a href="#">F5HE12</a> | Gene expression/regulation*                     | Possible regulator of IE gene expression<br>Tegument phosphoprotein <sup>†</sup><br>UL25 family <sup>†</sup> | (Dunn et al., 2003;Mocarski Jr, 2007;Kalejta, 2008) |
| UL35                         | MGD <sup>a</sup> /<br>D <sup>b</sup> | E (Chambers et al., 1999); E and L (2 proteins)(Liu and Biegelke, 2002)   | <a href="#">F5HE12</a> | (DNA) Replication                               | Tegument phosphoprotein <sup>†</sup><br>UL25 family <sup>†</sup>                                             | (Mocarski Jr, 2007)                                 |
| UL35                         | MGD <sup>a</sup> /<br>D <sup>b</sup> | E (Chambers et al., 1999); E and L (2 proteins)(Liu and Biegelke, 2002)   | <a href="#">F5HE12</a> | Nucleotide repair/modification                  | DNA damage response<br>Tegument phosphoprotein <sup>†</sup><br>UL25 family <sup>†</sup>                      | (Salsman et al., 2012)                              |
| UL35                         | MGD <sup>a</sup> /<br>D <sup>b</sup> | E (Chambers et al., 1999); E and L (2 proteins)(Liu and Biegelke, 2002)   | <a href="#">F5HE12</a> | Assembly/Maturation/Egress                      | Tegument assembly/viral egress<br>Tegument phosphoprotein <sup>†</sup><br>UL25 family <sup>†</sup>           | (Kalejta, 2008)                                     |

|        |                                      |                                                                              |                        |                            |                                                                                                           |                                                                                    |
|--------|--------------------------------------|------------------------------------------------------------------------------|------------------------|----------------------------|-----------------------------------------------------------------------------------------------------------|------------------------------------------------------------------------------------|
| UL35   | MGD <sup>a</sup> /<br>D <sup>b</sup> | E (Chambers et al., 1999); E and L (2 proteins)(Liu and Biegelke, 2002)      | <a href="#">F5HE12</a> | Virion protein             | Tegument phosphoprotein <sup>†</sup><br>UL25 family <sup>†</sup>                                          | (Dunn et al., 2003;Apweiler et al., 2004;Mocarski Jr, 2007)                        |
| UL36   | D <sup>a,b</sup>                     | E (Chambers et al., 1999); IE (Colberg-Poley et al., 1992;Mocarski Jr, 1996) | <a href="#">F5HAY6</a> | Apoptosis                  | Inhibitor of caspase-8 <sup>†</sup><br>IE tegument protein <sup>†</sup><br>US22 family <sup>†</sup>       | (Dunn et al., 2003;Apweiler et al., 2004;Mocarski Jr, 2007;McCormick et al., 2010) |
| UL36   | D <sup>a,b</sup>                     | E (Chambers et al., 1999); IE (Colberg-Poley et al., 1992;Mocarski Jr, 1996) | <a href="#">F5HAY6</a> | (DNA) Replication          | Initiation replication<br>IE tegument protein <sup>†</sup><br>US22 family <sup>†</sup>                    | (Smith and Pari, 1995a)                                                            |
| UL36   | D <sup>a,b</sup>                     | E (Chambers et al., 1999); IE (Colberg-Poley et al., 1992;Mocarski Jr, 1996) | <a href="#">F5HAY6</a> | Gene expression/regulation | Alters cellular and viral gene expression<br>IE tegument protein <sup>†</sup><br>US22 family <sup>†</sup> | (Colberg-Poley et al., 1992)                                                       |
| UL36   | D <sup>a,b</sup>                     | E (Chambers et al., 1999); IE (Colberg-Poley et al., 1992;Mocarski Jr, 1996) |                        | Virion protein             | IE tegument protein <sup>†</sup><br>US22 family <sup>†</sup>                                              | (Mocarski Jr, 2007)                                                                |
| UL37   | D <sup>b</sup>                       | IE (Uniprot)                                                                 | <a href="#">Q6SW94</a> | Latency*                   |                                                                                                           | (Rossetto et al., 2013)                                                            |
| UL37.1 | E <sup>a</sup>                       | IE (Mocarski Jr, 1996)                                                       | N/A                    | (DNA) Replication          | Initiation replication                                                                                    | (Colberg-Poley et al., 1992;Smith and Pari, 1995a)                                 |

|        |                                       |                                                   |                                |                                              |                                                     |                                                                                 |
|--------|---------------------------------------|---------------------------------------------------|--------------------------------|----------------------------------------------|-----------------------------------------------------|---------------------------------------------------------------------------------|
| UL37.1 | E <sup>a</sup>                        | IE (Mocarski Jr, 1996)                            | N/A                            | Apoptosis                                    | vMIA <sup>†</sup>                                   | (Dunn et al., 2003;Mocarski Jr, 2007)                                           |
| UL37.1 | E <sup>a</sup>                        | IE (Mocarski Jr, 1996)                            | N/A                            | Gene expression/regulation                   | US3 regulator                                       | (Biegelke, 1999)                                                                |
| UL37.3 | D <sup>a</sup>                        | IE (Mocarski Jr, 1996)                            | <a href="#">Q6SW94</a>         | (DNA) Replication                            | Initiation replication Glycoprotein <sup>†</sup>    | (Colberg-Poley et al., 1992)                                                    |
| UL37.3 | D <sup>a</sup>                        | IE (Mocarski Jr, 1996)                            | <a href="#">Q6SW94</a>         | Immunomodulation                             | MHC-I homologue Glycoprotein <sup>†</sup>           | (Wyrwicz and Rychlewski, 2008)                                                  |
| UL37.3 | D <sup>a</sup>                        | IE (Mocarski Jr, 1996)                            | <a href="#">Q6SW94</a>         | Viral growth                                 | Glycoprotein <sup>†</sup>                           | (Hayajneh et al., 2001)                                                         |
| UL38   | MGD <sup>a</sup> /<br>GD <sup>b</sup> | IE (Colberg-Poley et al., 1992;Mocarski Jr, 1996) | <a href="#">F5HG98</a>         | Latency*                                     | Glycoprotein <sup>†</sup>                           | (Goodrum et al., 2002;Rossetto et al., 2013)                                    |
| UL38   | MGD <sup>a</sup> /<br>GD <sup>b</sup> | IE (Colberg-Poley et al., 1992;Mocarski Jr, 1996) | <a href="#">F5HG98</a>         | Apoptosis                                    | Inhibitor of apoptosis Glycoprotein <sup>†</sup>    | (Terhune et al., 2007;Moorman et al., 2008;Xuan et al., 2009;Qian et al., 2011) |
| UL38   | MGD <sup>a</sup> /<br>GD <sup>b</sup> | IE (Colberg-Poley et al., 1992;Mocarski Jr, 1996) | <a href="#">F5HG98</a>         | Virion protein                               | Glycoprotein <sup>†</sup>                           | (Mocarski Jr, 2007)                                                             |
| UL38   | MGD <sup>a</sup> /<br>GD <sup>b</sup> | IE (Colberg-Poley et al., 1992;Mocarski Jr, 1996) | <a href="#">F5HG98</a>         | Gene expression/regulation                   | US3 regulator (repressor) Glycoprotein <sup>†</sup> | (Biegelke, 1999)                                                                |
| UL39   | D <sup>a</sup>                        | N/A                                               | <a href="#">P16813 (AD169)</a> | Cell tropism/Cell type-specific replication* | May be involved in cell tropism epithelial cells    | (Womack, 2011)                                                                  |
| UL39   | D <sup>a</sup>                        | N/A                                               | <a href="#">P16813 (AD169)</a> | Latency*                                     |                                                     | (Goodrum et al., 2002)                                                          |

|       |                  |                                                                         |                        |                                                 |                                                                                          |                                                             |
|-------|------------------|-------------------------------------------------------------------------|------------------------|-------------------------------------------------|------------------------------------------------------------------------------------------|-------------------------------------------------------------|
| UL40  | D <sup>b</sup>   | E/L (Chambers et al., 1999)                                             | <a href="#">Q6SW92</a> | Immunomodulation                                | Modulation NK cell signaling/function <sup>†</sup><br>Membrane glycoprotein <sup>†</sup> | (Apweiler et al., 2004;Mocarski Jr, 2007)                   |
| UL40  | D <sup>b</sup>   | E/L (Chambers et al., 1999)                                             | <a href="#">Q6SW92</a> | Latency*                                        | Membrane glycoprotein <sup>†</sup>                                                       | (Goodrum et al., 2002)                                      |
| UL41A | D <sup>b</sup>   | N/A                                                                     | <a href="#">F5HFG3</a> | Virion protein                                  | Membrane protein <sup>†</sup>                                                            | (Apweiler et al., 2004;Mocarski Jr, 2007)                   |
| UL42  | D <sup>a,b</sup> | N/A                                                                     | <a href="#">F5HHZ3</a> | Unknown                                         | Putative membrane protein <sup>†</sup>                                                   |                                                             |
| UL43  | D <sup>a,b</sup> | L (Chambers et al., 1999;Adair et al., 2002)                            | <a href="#">Q6SW89</a> | Virion protein                                  | Tegument protein <sup>†</sup><br>US22 family <sup>†</sup>                                | (Dunn et al., 2003;Apweiler et al., 2004;Mocarski Jr, 2007) |
| UL44  | E <sup>a,b</sup> | E/L (Mocarski Jr, 1996;Chambers et al., 1999); E (Iwayama et al., 1994) |                        | Modulation of host cell cycle/protein synthesis | P53 repression                                                                           | (Kwon et al., 2012)                                         |
| UL44  | E <sup>a,b</sup> | E/L (Mocarski Jr, 1996;Chambers et al., 1999); E (Iwayama et al., 1994) | <a href="#">F5HC97</a> | (DNA) Replication                               | DNA polymerase progressivity subunit <sup>†</sup>                                        | (Dunn et al., 2003;Apweiler et al., 2004;Mocarski Jr, 2007) |
| UL44  | E <sup>a,b</sup> | E/L (Mocarski Jr, 1996;Chambers et al., 1999); E (Iwayama et al., 1994) | <a href="#">F5HC97</a> | Latency*                                        |                                                                                          | (Goodrum et al., 2002;Rossetto et al., 2013)                |

|      |                                       |                                                    |                        |                             |                                                                                                           |                                                               |
|------|---------------------------------------|----------------------------------------------------|------------------------|-----------------------------|-----------------------------------------------------------------------------------------------------------|---------------------------------------------------------------|
| UL45 | D <sup>a,b</sup>                      | L (Patrone et al., 2003)                           | <a href="#">Q6SW87</a> | (DNA) Replication           | Ribonucleotide reductase homologue (enzymatically inactive) <sup>†</sup><br>Tegument protein <sup>†</sup> | (Dunn et al., 2003; Apweiler et al., 2004; Mocarski Jr, 2007) |
| UL45 | D <sup>a,b</sup>                      | L (Patrone et al., 2003)                           | <a href="#">Q6SW87</a> | Viral growth                | Influence on viral growth at low MOI<br>Tegument protein <sup>†</sup>                                     | (Mocarski Jr, 2007)                                           |
| UL45 | D <sup>a,b</sup>                      | L (Patrone et al., 2003)                           | <a href="#">Q6SW87</a> | Virion Protein              | Tegument protein <sup>†</sup>                                                                             | (Mocarski Jr, 2007)                                           |
| UL46 | E <sup>a,b</sup>                      | E/L (Chambers et al., 1999)                        | <a href="#">F5HA93</a> | Virion protein              | Minor capsid protein <sup>†</sup>                                                                         | (Dunn et al., 2003; Apweiler et al., 2004; Mocarski Jr, 2007) |
| UL47 | MGD <sup>a</sup> /<br>GD <sup>b</sup> | E/L (Chambers et al., 1999); L (Hyun et al., 1999) | <a href="#">Q6SW85</a> | Virion protein              | Tegument protein <sup>†</sup>                                                                             | (Mocarski Jr, 2007)                                           |
| UL47 | MGD <sup>a</sup> /<br>GD <sup>b</sup> | E/L (Chambers et al., 1999); L (Hyun et al., 1999) | <a href="#">Q6SW85</a> | Assembly/Maturation/Egress* | Tegument protein <sup>†</sup>                                                                             | (Apweiler et al., 2004)                                       |
| UL47 | MGD <sup>a</sup> /<br>GD <sup>b</sup> | E/L (Chambers et al., 1999); L (Hyun et al., 1999) | <a href="#">Q6SW85</a> | Cellular Trafficking*       | May be involved in release of vDNA post entry<br>Tegument protein <sup>†</sup>                            | (Mocarski Jr, 2007)                                           |
| UL48 | E <sup>a</sup> /GD <sup>b</sup>       | L (Chambers et al., 1999)                          | <a href="#">Q6SW84</a> | Viral growth                | DUB activity contributes to viral growth (largest) Tegument protein <sup>†</sup>                          | (Apweiler et al., 2004; Kim et al., 2009)                     |

|        |                                 |                                        |                        |                            |                                                                                         |                                                                                |
|--------|---------------------------------|----------------------------------------|------------------------|----------------------------|-----------------------------------------------------------------------------------------|--------------------------------------------------------------------------------|
| UL48   | E <sup>a</sup> /GD <sup>b</sup> | L (Chambers et al., 1999)              | <a href="#">Q6SW84</a> | Cellular Trafficking*      | Intracellular capsid transport <sup>2†</sup><br>(largest) Tegument protein <sup>†</sup> | (Mocarski Jr, 2007)                                                            |
| UL48   | E <sup>a</sup> /GD <sup>b</sup> | L (Chambers et al., 1999)              | <a href="#">Q6SW84</a> | Virion protein             | (largest) Tegument protein <sup>†</sup>                                                 | (Dunn et al., 2003;Mocarski Jr, 2007)                                          |
| UL48.5 | E <sup>a,b</sup>                | N/A                                    | N/A                    | Virion protein             | Located on tips of hexons of capsid <sup>†</sup>                                        | (Baldick and Shenk, 1996;Dunn et al., 2003;Mocarski Jr, 2007)                  |
| UL48.5 | E <sup>a,b</sup>                | N/A                                    | N/A                    | Cellular Trafficking*      | Capsid transport <sup>2†</sup><br>Located on tips of hexons of capsid <sup>†</sup>      | (Mocarski Jr, 2007)                                                            |
| UL49   | E <sup>a,b</sup>                | E/L (Chambers et al., 1999)            | <a href="#">Q6SW82</a> | (DNA) Replication          | DNA synthesis                                                                           | (Apweiler et al., 2004;Zhang et al., 2010;Wang et al., 2013a)                  |
| UL50   | E <sup>a,b</sup>                | E /delayed E (Buchkovich et al., 2010) | <a href="#">Q6SW81</a> | Virion protein*            | Inner nuclear membrane protein <sup>†</sup>                                             | (Mocarski Jr, 2007)                                                            |
| UL50   | E <sup>a,b</sup>                | E /delayed E (Buchkovich et al., 2010) | <a href="#">Q6SW81</a> | Latency*                   | Inner nuclear membrane protein <sup>†</sup>                                             | (Rossetto et al., 2013)                                                        |
| UL50   | E <sup>a,b</sup>                | E /delayed E (Buchkovich et al., 2010) | <a href="#">Q6SW81</a> | Assembly/Maturation/Egress | Nuclear egress<br>Inner nuclear membrane protein <sup>†</sup>                           | (Dunn et al., 2003;Mocarski Jr, 2007;Sharma et al., 2014)                      |
| UL51   | E <sup>a,b</sup>                | L (Borst et al., 2013)                 | <a href="#">F5HGI9</a> | Assembly/Maturation/Egress | DNA cleavage-packaging                                                                  | (Dunn et al., 2003;Apweiler et al., 2004;Mocarski Jr, 2007;Borst et al., 2013) |

|      |                  |                                                                  |                        |                                           |                                                                                 |                                                                                           |
|------|------------------|------------------------------------------------------------------|------------------------|-------------------------------------------|---------------------------------------------------------------------------------|-------------------------------------------------------------------------------------------|
| UL52 | E <sup>a,b</sup> | L (Chambers et al., 1999; Borst et al., 2008)                    | <a href="#">Q6SW79</a> | Assembly/Maturation/Egress                | DNA cleavage-packaging                                                          | (Dunn et al., 2003; Borst et al., 2008)                                                   |
| UL52 | E <sup>a,b</sup> | L (Chambers et al., 1999; Borst et al., 2008)                    | <a href="#">Q6SW79</a> | Latency*                                  |                                                                                 | (Rossetto et al., 2013)                                                                   |
| UL52 | E <sup>a,b</sup> | L (Chambers et al., 1999; Borst et al., 2008)                    | <a href="#">Q6SW79</a> | Cellular Trafficking*                     | Capsid transport <sup>††</sup>                                                  | (Mocarski Jr, 2007)                                                                       |
| UL53 | E <sup>a,b</sup> | E (Chambers et al., 1999); L (Dal Monte et al., 2002)            | <a href="#">F5HFZ4</a> | Assembly/Maturation/Egress                | Nuclear egress<br>Nuclear matrix protein <sup>†</sup>                           | (Dunn et al., 2003; Mocarski Jr, 2007; Sharma et al., 2014)                               |
| UL54 | E <sup>a,b</sup> | E (Mocarski Jr, 1996; Chambers et al., 1999)                     | <a href="#">Q6SW77</a> | (DNA) Replication <sup>(SUL54-UL57)</sup> | DNA polymerase <sup>†</sup><br>Formation of replication compartment (UL54-UL57) | (Dunn et al., 2003; Apweiler et al., 2004; Mocarski Jr, 2007)                             |
| UL55 | E <sup>a,b</sup> | E (Mocarski Jr, 1996; Smuda et al., 1997; Chambers et al., 1999) | <a href="#">F5HB53</a> | Entry                                     | Heparan binding <sup>†</sup><br>Virion glycoprotein(gB) <sup>†</sup>            | (Dunn et al., 2003; Apweiler et al., 2004; Mocarski Jr, 2007; Isaacson and Compton, 2009) |
| UL55 | E <sup>a,b</sup> | E (Mocarski Jr, 1996; Smuda et al., 1997; Chambers et al., 1999) | <a href="#">F5HB53</a> | Virion protein                            | Heparan binding <sup>†</sup><br>Virion glycoprotein(gB) <sup>†</sup>            | (Dunn et al., 2003; Apweiler et al., 2004; Mocarski Jr, 2007; Isaacson and Compton, 2009) |

|      |                  |                                                                |                                                   |                                           |                                                                                        |                                                                                                      |
|------|------------------|----------------------------------------------------------------|---------------------------------------------------|-------------------------------------------|----------------------------------------------------------------------------------------|------------------------------------------------------------------------------------------------------|
| UL55 | E <sup>a,b</sup> | E (Mocarski Jr, 1996;Smuda et al., 1997;Chambers et al., 1999) | <a href="#">F5HB53</a>                            | (DNA) Replication <sup>(SUL54-UL57)</sup> | Formation of replication compartment (UL54-UL57)                                       | (Xiaofei et al., 2012)                                                                               |
| UL56 | E <sup>a,b</sup> | E (Mocarski Jr, 1996;Chambers et al., 1999)                    | <a href="#">F5HC79</a>                            | (DNA) Replication <sup>(SUL54-UL57)</sup> | Formation of replication compartment (UL54-UL57)                                       | (Xiaofei et al., 2012)                                                                               |
| UL56 | E <sup>a,b</sup> | E (Mocarski Jr, 1996;Chambers et al., 1999)                    | <a href="#">F5HC79</a>                            | Assembly/Maturation/Egress                | Binds DNA packaging motif <sup>†</sup><br>DNA cleavage-packaging                       | (Dunn et al., 2003;Apweiler et al., 2004;Mocarski Jr, 2007;Champier et al., 2008;Borst et al., 2013) |
| UL56 | E <sup>a,b</sup> | E (Mocarski Jr, 1996;Chambers et al., 1999)                    | <a href="#">F5HC79</a>                            | Nucleotide repair/modification            | Nuclease activity <sup>†</sup>                                                         | (Mocarski Jr, 2007;Champier et al., 2008;Borst et al., 2013)                                         |
| UL57 | E <sup>a,b</sup> | E (Mocarski Jr, 1996;Chambers et al., 1999)                    | <a href="#">F5HDQ6</a>                            | (DNA) Replication <sup>(SUL54-UL57)</sup> | Formation of replication compartment (UL54-UL57)<br>ssDNA-binding protein <sup>†</sup> | (Dunn et al., 2003;Apweiler et al., 2004;Mocarski Jr, 2007;Woon et al., 2008;Xiaofei et al., 2012)   |
| UL59 | D <sup>a</sup>   | L (Chambers et al., 1999)                                      | <a href="#">A8T7D9</a>                            | Unknown                                   |                                                                                        |                                                                                                      |
| UL61 | E <sup>b</sup>   | E (Chambers et al., 1999)                                      | <a href="#">P16818</a><br><a href="#">(AD169)</a> | Latency*                                  |                                                                                        | (Goodrum et al., 2002)                                                                               |
| UL62 | D <sup>a</sup>   | N/A                                                            | <a href="#">P16819</a><br><a href="#">(AD169)</a> | Unknown                                   |                                                                                        |                                                                                                      |
| UL64 | D <sup>a</sup>   | N/A                                                            | <a href="#">P16821</a><br><a href="#">(AD169)</a> | Latency*                                  |                                                                                        | (Goodrum et al., 2002)                                                                               |



|      |                                       |                                                   |                                                     |                                                 |                                                           |                                                                                                          |
|------|---------------------------------------|---------------------------------------------------|-----------------------------------------------------|-------------------------------------------------|-----------------------------------------------------------|----------------------------------------------------------------------------------------------------------|
| UL65 | MGD <sup>a</sup> /<br>D <sup>b</sup>  | L (Bergallo et al., 2008)                         | <a href="#">P17148</a><br>( <a href="#">AD169</a> ) | Latency*                                        |                                                           | (Goodrum et al., 2002)                                                                                   |
| UL67 | D <sup>a</sup>                        | L (Chambers et al., 1999)                         | <a href="#">P16747</a><br>( <a href="#">AD169</a> ) | Latency*                                        |                                                           | (Goodrum et al., 2002; Cheung et al., 2006)                                                              |
| UL68 | N/A                                   | L ((Chambers et al., 1999)                        | <a href="#">P16748</a><br>( <a href="#">AD169</a> ) | Latency*                                        |                                                           | (Goodrum et al., 2002; Cheung et al., 2006)                                                              |
| UL69 | SGD <sup>a</sup> /<br>GD <sup>b</sup> | E/L (Winkler et al., 1994; Chambers et al., 1999) | <a href="#">Q6SW73</a>                              | Gene expression/regulation                      | Binds mRNA cap-binding complex<br>Tegument phosphoprotein | (Dunn et al., 2003; Apweiler et al., 2004; Kalejta, 2008; Kapasi and Spector, 2008; Aoyagi et al., 2010) |
| UL69 | SGD <sup>a</sup> /<br>GD <sup>b</sup> | E/L (Winkler et al., 1994; Chambers et al., 1999) | <a href="#">Q6SW73</a>                              | Cellular Trafficking                            | mRNA export<br>Tegument phosphoprotein                    | (Kalejta, 2008)                                                                                          |
| UL69 | SGD <sup>a</sup> /<br>GD <sup>b</sup> | E/L (Winkler et al., 1994; Chambers et al., 1999) | <a href="#">Q6SW73</a>                              | Modulation of host cell cycle/protein synthesis | G1 arrest<br>Tegument phosphoprotein                      | (Apweiler et al., 2004; Mocarski Jr, 2007; Kalejta, 2008)                                                |
| UL69 | SGD <sup>a</sup> /<br>GD <sup>b</sup> | E/L (Winkler et al., 1994; Chambers et al., 1999) | <a href="#">Q6SW73</a>                              | Virion protein                                  | Tegument phosphoprotein                                   | (Dunn et al., 2003; Mocarski Jr, 2007; Kalejta, 2008)                                                    |
| UL70 | E <sup>a,b</sup>                      | N/A                                               | <a href="#">F5HG51</a>                              | (DNA) Replication                               | DNA helicase-primase <sup>†</sup>                         | (Dunn et al., 2003; Apweiler et al., 2004; Mocarski Jr, 2007; Woon et al., 2008)                         |
| UL70 | E <sup>a,b</sup>                      | N/A                                               | <a href="#">F5HG51</a>                              | Latency*                                        |                                                           | (Goodrum et al., 2002)                                                                                   |

|      |                                       |                             |                        |                                |                                                                                      |                                                               |
|------|---------------------------------------|-----------------------------|------------------------|--------------------------------|--------------------------------------------------------------------------------------|---------------------------------------------------------------|
| UL71 | E <sup>a</sup> /GD <sup>b</sup>       | E/L (Schauflinger et al.)   | <a href="#">F5HEA3</a> | Assembly/Maturation/Egress     | Late envelopment<br>Cytoplasmic egress <sup>†</sup><br>Tegument protein <sup>†</sup> | (Schauflinger et al., 2011; Meissner et al., 2012)            |
| UL71 | E <sup>a</sup> /GD <sup>b</sup>       | E/L (Schauflinger et al.)   | <a href="#">F5HEA3</a> | Virion protein                 | Tegument protein <sup>†</sup>                                                        | (Apweiler et al., 2004; Mocarski Jr, 2007)                    |
| UL72 | MGD <sup>a</sup> /<br>GD <sup>b</sup> | E/L (Chambers et al., 1999) | <a href="#">Q6SW70</a> | Virion protein                 |                                                                                      | (Mocarski Jr, 2007)                                           |
| UL72 | MGD <sup>a</sup> /<br>GD <sup>b</sup> | E/L (Chambers et al., 1999) | <a href="#">Q6SW70</a> | Nucleotide repair/modification | Deoxyuridine triphosphatase homologue (not active)<br><sup>†</sup>                   | (Dunn et al., 2003; Apweiler et al., 2004; Mocarski Jr, 2007) |
| UL73 | E <sup>a,b</sup>                      | E/L (Chambers et al., 1999) | <a href="#">F5HHQ0</a> | Entry                          | Virion glycoprotein (gN) <sup>†</sup>                                                | (Dunn et al., 2003; Mocarski Jr, 2007)                        |
| UL73 | E <sup>a,b</sup>                      | E/L (Chambers et al., 1999) | <a href="#">F5HHQ0</a> | Virion Protein                 | Virion glycoprotein (gN) <sup>†</sup>                                                | (Apweiler et al., 2004; Mocarski Jr, 2007)                    |
| UL73 | E <sup>a,b</sup>                      | E/L (Chambers et al., 1999) | <a href="#">F5HHQ0</a> | Latency*                       |                                                                                      | (Goodrum et al., 2002)                                        |
| UL74 | MGD <sup>a</sup> /<br>GD <sup>b</sup> | L (Huber and Compton, 1998) | <a href="#">F5HGPI</a> | Viral spread                   | Cell-to-cell spread<br>Virion glycoprotein (gO) <sup>†</sup>                         | (Kinzler and Compton, 2005)                                   |
| UL74 | MGD <sup>a</sup> /<br>GD <sup>b</sup> | L (Huber and Compton, 1998) | <a href="#">F5HGPI</a> | Assembly/Maturation/Egress     | Secondary Envelopment<br>Virion glycoprotein (gO) <sup>†</sup>                       | (Jiang et al., 2008)                                          |
| UL74 | MGD <sup>a</sup> /<br>GD <sup>b</sup> | L (Huber and Compton, 1998) | <a href="#">F5HGPI</a> | Entry                          | Virion glycoprotein (gO) <sup>†</sup>                                                | (Mocarski Jr, 2007)                                           |

|      |                                       |                                                             |                        |                            |                                                                                                                    |                                                 |
|------|---------------------------------------|-------------------------------------------------------------|------------------------|----------------------------|--------------------------------------------------------------------------------------------------------------------|-------------------------------------------------|
| UL74 | MGD <sup>a</sup> /<br>GD <sup>b</sup> | L (Huber and<br>Compton, 1998)                              | <a href="#">F5HGP1</a> | Immunomodulation           | Reduces the inhibitory<br>effect of gH- and gB-<br>specific antibodies<br>Virion glycoprotein<br>(gO) <sup>†</sup> | (Jiang et al., 2011)                            |
| UL74 | MGD <sup>a</sup> /<br>GD <sup>b</sup> | L (Huber and<br>Compton, 1998)                              | <a href="#">F5HGP1</a> | Virion protein             | Virion glycoprotein<br>(gO) <sup>†</sup>                                                                           | (Apweiler et al.,<br>2004;Mocarski Jr,<br>2007) |
| UL75 | E <sup>a,b</sup>                      | E/L (Chambers et<br>al., 1999); L<br>(Mocarski Jr,<br>1996) | <a href="#">Q6SW67</a> | Virion protein             | Virion glycoprotein<br>(gH) <sup>†</sup>                                                                           | (Mocarski Jr, 2007)                             |
| UL75 | E <sup>a,b</sup>                      | E/L (Chambers et<br>al., 1999); L<br>(Mocarski Jr,<br>1996) | <a href="#">Q6SW67</a> | Entry                      | Virion glycoprotein<br>(gH) <sup>†</sup>                                                                           | (Apweiler et al.,<br>2004;Mocarski Jr,<br>2007) |
| UL75 | E <sup>a,b</sup>                      | E/L (Chambers et<br>al., 1999); L<br>(Mocarski Jr,<br>1996) | <a href="#">Q6SW67</a> | Latency*                   | Virion glycoprotein<br>(gH) <sup>†</sup>                                                                           | (Goodrum et al.,<br>2002)                       |
| UL76 | E <sup>a</sup> /GD <sup>b</sup>       | L (Wang et al.,<br>2004)                                    | <a href="#">Q6SW66</a> | Virion protein             | Virion-associated<br>regulatory protein <sup>†</sup>                                                               | (Mocarski Jr, 2007)                             |
| UL76 | E <sup>a</sup> /GD <sup>b</sup>       | L (Wang et al.,<br>2004)                                    | <a href="#">Q6SW66</a> | Apoptosis                  | Inducer of DNA<br>damage<br>Virion-associated<br>regulatory protein <sup>†</sup>                                   | (Siew et al.,<br>2009;Costa et al.,<br>2013)    |
| UL76 | E <sup>a</sup> /GD <sup>b</sup>       | L (Wang et al.,<br>2004)                                    | <a href="#">Q6SW66</a> | Gene expression/regulation | Regulator of UL77<br>expression<br>Virion-associated<br>regulatory protein <sup>†</sup>                            | (Isomura et al.,<br>2010)                       |

|      |                                 |                           |                        |                                             |                                                                                                            |                                                                                   |
|------|---------------------------------|---------------------------|------------------------|---------------------------------------------|------------------------------------------------------------------------------------------------------------|-----------------------------------------------------------------------------------|
| UL76 | E <sup>a</sup> /GD <sup>b</sup> | L (Wang et al., 2004)     | <a href="#">Q6SW66</a> | (DNA) Replication                           | Negative regulator of replication<br>Virion-associated regulatory protein <sup>†</sup>                     | (Wang et al., 2004)                                                               |
| UL76 | E <sup>a</sup> /GD <sup>b</sup> | L (Wang et al., 2004)     | <a href="#">Q6SW66</a> | Latency*                                    | Virion-associated regulatory protein <sup>†</sup>                                                          | (Goodrum et al., 2002;Wang et al., 2004)                                          |
| UL77 | E <sup>a,b</sup>                | E (Chambers et al., 1999) | <a href="#">Q6SW65</a> | Assembly/Maturation/Egress                  | DNA packaging<br>Portal capping protein <sup>†</sup>                                                       | (Dunn et al., 2003;Apweiler et al., 2004;Mocarski Jr, 2007;Meissner et al., 2011) |
| UL78 | D <sup>a,b</sup>                | E (Chambers et al., 1999) | <a href="#">F5HET1</a> | Immunomodulation                            | Modulation chemo- and/or cytokine receptors<br>Chemokine receptor-like protein<br>GPCR family <sup>†</sup> | (Beisser et al., 2002;Mocarski Jr, 2007;Tadagaki et al., 2012)                    |
| UL78 | D <sup>a,b</sup>                | E (Chambers et al., 1999) | <a href="#">F5HET1</a> | Cell tropism/Cell type-specific replication | Involved in cell tropism epithelial cells<br>Chemokine receptor-like protein<br>GPCR family <sup>†</sup>   | (O'Connor and Shenk, 2012)                                                        |
| UL79 | E <sup>a,b</sup>                | E (Isomura et al., 2011)  | <a href="#">Q6SW63</a> | Gene expression/regulation                  | Required for accumulation late transcripts                                                                 | (Isomura et al., 2011;Perng et al., 2011)                                         |
| UL79 | E <sup>a,b</sup>                | E (Isomura et al., 2011)  | <a href="#">Q6SW63</a> | Latency*                                    |                                                                                                            | (Rossetto et al., 2013)                                                           |
| UL80 | E <sup>a,b</sup>                | L (Welch et al., 1991)    | <a href="#">Q6SW62</a> | Latency*                                    | Protease and capsid assembly protein <sup>†</sup>                                                          | (Goodrum et al., 2002)                                                            |
| UL80 | E <sup>a,b</sup>                | L (Welch et al., 1991)    | <a href="#">Q6SW62</a> | Assembly/Maturation/Egress                  | Protease and capsid assembly protein <sup>†</sup>                                                          | (Dunn et al., 2003;Mocarski Jr, 2007)                                             |

|              |                                       |                                             |                        |                                                 |                                                                                                |                                                                                  |
|--------------|---------------------------------------|---------------------------------------------|------------------------|-------------------------------------------------|------------------------------------------------------------------------------------------------|----------------------------------------------------------------------------------|
| UL80         | E <sup>a,b</sup>                      | L (Welch et al., 1991)                      | <a href="#">Q6SW62</a> | (DNA) Replication*                              | Involvement nuclear localization signals<br>Protease and capsid assembly protein <sup>†</sup>  | (Nguyen et al., 2008)                                                            |
| UL80.5       | E <sup>b</sup>                        | N/A                                         | <a href="#">F5HE40</a> | Assembly/Maturation/Egress                      | Early capsid formation                                                                         | (Loveland et al., 2007;Mocarski Jr, 2007)                                        |
| UL81ast/LUNA | N/A                                   | L (Keyes et al., 2012)                      | N/A                    | Latency                                         | Established LAT                                                                                | (Goodrum et al., 2002;Bego et al., 2005;Bego et al., 2011;Rossetto et al., 2013) |
| UL82/pp71    | SGD <sup>a</sup> /<br>GD <sup>b</sup> | L (Mocarski Jr, 1996;Chambers et al., 1999) | <a href="#">F5HBC6</a> | Virion protein                                  | Tegument phosphoprotein <sup>†</sup><br>UL82 family <sup>†</sup>                               | (Dunn et al., 2003;Mocarski Jr, 2007)                                            |
| UL82/pp71    | SGD <sup>a</sup> /<br>GD <sup>b</sup> | L (Mocarski Jr, 1996;Chambers et al., 1999) | <a href="#">F5HBC6</a> | Gene expression/regulation                      | Activator of MIEP<br>Tegument phosphoprotein <sup>†</sup><br>UL82 family <sup>†</sup>          | (Dunn et al., 2003;Mocarski Jr, 2007;Penkert and Kalejta, 2012)                  |
| UL82/pp71    | SGD <sup>a</sup> /<br>GD <sup>b</sup> | L (Mocarski Jr, 1996;Chambers et al., 1999) | <a href="#">F5HBC6</a> | Modulation of host cell cycle/protein synthesis | Interaction with Rb family<br>Tegument phosphoprotein <sup>†</sup><br>UL82 family <sup>†</sup> | (Apweiler et al., 2004;Penkert and Kalejta, 2012)                                |
| UL82/pp71    | SGD <sup>a</sup> /<br>GD <sup>b</sup> | L (Mocarski Jr, 1996;Chambers et al., 1999) | <a href="#">F5HBC6</a> | Immunomodulation                                | Granzyme M degradation<br>Tegument phosphoprotein <sup>†</sup><br>UL82 family <sup>†</sup>     | (Penkert and Kalejta, 2012)                                                      |

|           |                                       |                                                    |                        |                                              |                                                                                                    |                                                                                                                                                |
|-----------|---------------------------------------|----------------------------------------------------|------------------------|----------------------------------------------|----------------------------------------------------------------------------------------------------|------------------------------------------------------------------------------------------------------------------------------------------------|
| UL82/pp71 | SGD <sup>a</sup> /<br>GD <sup>b</sup> | L (Mocarski Jr, 1996; Chambers et al., 1999)       | <a href="#">F5HBC6</a> | Latency*                                     | Prevents DAXX degradation<br>Tegument phosphoprotein <sup>†</sup><br>UL82 family <sup>†</sup>      | (Penkert and Kalejta, 2012)                                                                                                                    |
| UL83/pp65 | D <sup>a,b</sup>                      | L (Chambers et al., 1999); E/L (Mocarski Jr, 1996) | <a href="#">Q6SW59</a> | Cell tropism/Cell type-specific replication* | May be involved in cell tropism epithelial cells                                                   | (Womack, 2011)                                                                                                                                 |
| UL83/pp65 | D <sup>a,b</sup>                      | L (Chambers et al., 1999); E/L (Mocarski Jr, 1996) | <a href="#">Q6SW59</a> | Virion protein                               | Major Tegument phosphoprotein <sup>†</sup><br>UL82 family <sup>†</sup>                             | (Dunn et al., 2003; Mocarski Jr, 2007)                                                                                                         |
| UL83/pp65 | D <sup>a,b</sup>                      | L (Chambers et al., 1999); E/L (Mocarski Jr, 1996) | <a href="#">Q6SW59</a> | Gene expression/regulation                   | Activator of MIEP<br>Major Tegument phosphoprotein <sup>†</sup><br>UL82 family <sup>†</sup>        | (Cristea et al., 2010; Arcangeletti et al., 2011)                                                                                              |
| UL83/pp65 | D <sup>a,b</sup>                      | L (Chambers et al., 1999); E/L (Mocarski Jr, 1996) | <a href="#">Q6SW59</a> | Immunomodulation                             | Suppression IFN response<br>Major Tegument phosphoprotein <sup>†</sup><br>UL82 family <sup>†</sup> | (Apweiler et al., 2004; Mocarski Jr, 2007)                                                                                                     |
| UL84      | E <sup>a,b</sup>                      | E/L (Mocarski Jr, 1996; Chambers et al., 1999)     | <a href="#">F5HB40</a> | (DNA) Replication                            | Required for oriLyt-dependent DNA replication( through protein-protein interaction)                | (Dunn et al., 2003; Colletti et al., 2007; Mocarski Jr, 2007; Woon et al., 2008; Gao and Pari, 2009; Kagele et al., 2009; Strang et al., 2012) |

|        |                                      |                                                    |                        |                             |                                                                              |                                                             |
|--------|--------------------------------------|----------------------------------------------------|------------------------|-----------------------------|------------------------------------------------------------------------------|-------------------------------------------------------------|
| UL84   | E <sup>a,b</sup>                     | E/L (Mocarski Jr, 1996;Chambers et al., 1999)      | <a href="#">F5HB40</a> | Viral Growth                | Nucleoplasmic shuttling essential for viral growth                           | (Gao et al., 2010)                                          |
| UL84   | E <sup>a,b</sup>                     | E/L (Mocarski Jr, 1996;Chambers et al., 1999)      | <a href="#">F5HB40</a> | Latency*                    |                                                                              | (Goodrum et al., 2002;Rossetto et al., 2013)                |
| UL85   | E <sup>a,b</sup>                     | E/L (Chambers et al., 1999)                        | <a href="#">F5HIN9</a> | Assembly/Maturation/Egress  | Minor capsid protein <sup>†</sup>                                            | (Dunn et al., 2003;Mocarski Jr, 2007)                       |
| UL86   | E <sup>a,b</sup>                     | E/L (Chambers et al., 1999); L (Mocarski Jr, 1996) | <a href="#">F5HGT1</a> | Assembly/Maturation/Egress  | Major capsid protein <sup>†</sup>                                            | (Dunn et al., 2003;Mocarski Jr, 2007)                       |
| UL87   | E <sup>a,b</sup>                     | E (Isomura et al., 2010)                           | <a href="#">Q6SW55</a> | Gene expression/regulation  | Required for accumulation late transcripts                                   | (Isomura et al., 2011)                                      |
| UL87   | E <sup>a,b</sup>                     | E (Isomura et al., 2011)                           | <a href="#">Q6SW55</a> | Latency*                    |                                                                              | (Goodrum et al., 2002;Rossetto et al., 2013)                |
| UL88   | MGD <sup>a</sup> /<br>D <sup>b</sup> | N/A                                                | <a href="#">F5H9F9</a> | Virion protein              | Tegument protein <sup>†</sup>                                                | (Dunn et al., 2003;Apweiler et al., 2004;Mocarski Jr, 2007) |
| UL88   | MGD <sup>a</sup> /<br>D <sup>b</sup> | N/A                                                | <a href="#">F5H9F9</a> | Assembly/Maturation/Egress* | Cytoplasmic egress <sup>†</sup><br>Tegument protein <sup>†</sup>             | (Mocarski Jr, 2007)                                         |
| UL89   | E <sup>a,b</sup>                     | E/L (Chambers et al., 1999)                        | <a href="#">F5HCU8</a> | Viral growth                | shRNA against UL89 inhibits of formation of replicative infectious particles | (Thoma and Bogner, 2010)                                    |
| UL89.1 | E <sup>a,b</sup>                     | N/A                                                | <a href="#">F5HCU8</a> | Assembly/Maturation/Egress  | Terminase ATPase subunit <sup>†</sup>                                        | (Dunn et al., 2003;Apweiler et al., 2004;Mocarski Jr, 2007) |

|        |                                 |                                              |                        |                             |                                                                                            |                                                                                      |
|--------|---------------------------------|----------------------------------------------|------------------------|-----------------------------|--------------------------------------------------------------------------------------------|--------------------------------------------------------------------------------------|
| UL89.2 | D <sup>a</sup>                  | N/A                                          | <a href="#">F5HCU8</a> | Assembly/Maturation/Egress  | Terminase ATPase subunit <sup>†</sup>                                                      | (Dunn et al., 2003; Apweiler et al., 2004; Mocarski Jr, 2007)                        |
| UL90   | E <sup>a</sup>                  | N/A                                          | <a href="#">P16796</a> | Unknown                     |                                                                                            |                                                                                      |
| UL91   | E <sup>a,b</sup>                | L (Chambers et al., 1999)                    | <a href="#">F5HFJ8</a> | Gene expression/regulation  | Essential for transcription of viral true late ( $\gamma$ 2) genes                         | (Omoto and Mocarski, 2013)                                                           |
| UL92   | E <sup>a,b</sup>                | L (Chambers et al., 1999)                    | <a href="#">F5HAS7</a> | Gene expression/regulation  | Essential for transcription of viral true late ( $\gamma$ 2) genes                         | (Omoto and Mocarski, 2014)                                                           |
| UL93   | E <sup>a,b</sup>                | L (Chambers et al., 1999)                    | <a href="#">Q6SW50</a> | Assembly/Maturation/Egress* | Possible role in DNA packaging<br>Tegument protein <sup>†</sup>                            | (Apweiler et al., 2004)                                                              |
| UL93   | E <sup>a,b</sup>                | L (Chambers et al., 1999)                    | <a href="#">Q6SW50</a> | Virion protein              | Tegument protein <sup>†</sup>                                                              | (Mocarski Jr, 2007)                                                                  |
| UL93   | E <sup>a,b</sup>                | L (Chambers et al., 1999)                    | <a href="#">Q6SW50</a> | Cellular trafficking*       | Capsid transport <sup>?†</sup><br>Tegument protein <sup>†</sup>                            | (Mocarski Jr, 2007)                                                                  |
| UL94   | E <sup>a</sup> /GD <sup>b</sup> | L (Wing et al., 1996; Chambers et al., 1999) | <a href="#">F5HAC7</a> | Virion protein              | Tegument protein <sup>†</sup>                                                              | (Dunn et al., 2003; Apweiler et al., 2004; Mocarski Jr, 2007; Phillips et al., 2012) |
| UL94   | E <sup>a</sup> /GD <sup>b</sup> | L (Wing et al., 1996; Chambers et al., 1999) | <a href="#">F5HAC7</a> | Assembly/Maturation/Egress  | Secondary envelopment<br>Cytoplasmic egress <sup>?†</sup><br>Tegument protein <sup>†</sup> | (Mocarski Jr, 2007; Phillips and Bresnahan, 2012)                                    |
| UL95   | E <sup>a,b</sup>                | E/L (Wing and Huang, 1995)                   | <a href="#">Q6SW48</a> | Gene expression/regulation  | Required for accumulation late transcripts                                                 | (Isomura et al., 2011)                                                               |
| UL95   | E <sup>a,b</sup>                | E/L (Wing and Huang, 1995)                   | <a href="#">Q6SW48</a> | Assembly/Maturation/Egress* | Encapsidation chaperone protein <sup>?†</sup>                                              | (Mocarski Jr, 2007)                                                                  |
| UL95   | E <sup>a,b</sup>                | E/L (Wing and Huang, 1995)                   | <a href="#">Q6SW48</a> | Latency*                    |                                                                                            | (Rossetto et al., 2013)                                                              |



|           |                                   |                             |                        |                                                 |                                                                            |                                                                     |
|-----------|-----------------------------------|-----------------------------|------------------------|-------------------------------------------------|----------------------------------------------------------------------------|---------------------------------------------------------------------|
| UL96      | E <sup>a</sup> /GD <sup>b</sup>   | E/L (Chambers et al., 1999) | <a href="#">F5H8R6</a> | Virion protein                                  | Tegument protein <sup>†</sup>                                              | (Apweiler et al., 2004;Mocarski Jr, 2007;Tandon and Mocarski, 2011) |
| UL96      | E <sup>a</sup> /GD <sup>b</sup>   | E/L (Chambers et al., 1999) | <a href="#">F5H8R6</a> | Assembly/Maturation/Egress                      | Stabilizes pp150-associated nucleocapsids<br>Tegument protein <sup>†</sup> | (Tandon and Mocarski, 2011)                                         |
| UL97      | MGD <sup>a</sup> /GD <sup>b</sup> | E/L (Chambers et al., 1999) | <a href="#">Q6SW46</a> | Modulation of host cell cycle/protein synthesis | Mimics cdc2/CDK1 <sup>†</sup><br>Tegument protein <sup>†</sup>             | (Apweiler et al., 2004;Mocarski Jr, 2007)                           |
| UL97      | MGD <sup>a</sup> /GD <sup>b</sup> | E/L (Chambers et al., 1999) | <a href="#">Q6SW46</a> | Gene expression/regulation                      | Regulator of MIEP<br>Tegument protein <sup>†</sup>                         | (Bigley et al., 2013)                                               |
| UL97      | MGD <sup>a</sup> /GD <sup>b</sup> | E/L (Chambers et al., 1999) | <a href="#">Q6SW46</a> | Virion protein                                  | Tegument protein <sup>†</sup>                                              | (Mocarski Jr, 2007)                                                 |
| UL97      | MGD <sup>a</sup> /GD <sup>b</sup> | E/L (Chambers et al., 1999) | <a href="#">Q6SW46</a> | (DNA) Replication                               | Tegument protein <sup>†</sup>                                              | (Mocarski Jr, 2007)                                                 |
| UL97      | MGD <sup>a</sup> /GD <sup>b</sup> | E/L (Chambers et al., 1999) | <a href="#">Q6SW46</a> | Assembly/Maturation/Egress                      | DNA packaging<br>Nuclear egress<br>Tegument protein <sup>†</sup>           | (Mocarski Jr, 2007)                                                 |
| UL98      | E <sup>a,b</sup>                  | E/L (Chambers et al., 1999) | <a href="#">F5HF49</a> | Nucleotide repair/modification                  | Deoxyribonuclease <sup>†</sup>                                             | (Dunn et al., 2003;Apweiler et al., 2004;Mocarski Jr, 2007)         |
| UL98      | E <sup>a,b</sup>                  | E/L (Chambers et al., 1999) | <a href="#">F5HF49</a> | Latency*                                        |                                                                            | (Goodrum et al., 2002)                                              |
| UL99/pp28 | E <sup>a,b</sup>                  | L (Mocarski Jr, 1996)       | <a href="#">F5HI87</a> | Virion protein                                  | Myristylated tegument protein <sup>†</sup>                                 | (Dunn et al., 2003;Apweiler et al., 2004;Mocarski Jr, 2007)         |
| UL99/pp28 | E <sup>a,b</sup>                  | L (Mocarski Jr, 1996)       | <a href="#">F5HI87</a> | Latency*                                        | Myristylated tegument protein <sup>†</sup>                                 | (Goodrum et al., 2002)                                              |

|           |                                       |                                                         |                        |                            |                                                                                                            |                                                                                   |
|-----------|---------------------------------------|---------------------------------------------------------|------------------------|----------------------------|------------------------------------------------------------------------------------------------------------|-----------------------------------------------------------------------------------|
| UL99/pp28 | E <sup>a,b</sup>                      | L (Mocarski Jr, 1996)                                   | <a href="#">F5HI87</a> | Assembly/Maturation/Egress | Secondary envelopment<br>Cytoplasmic egress <sup>†</sup><br>Myristylated tegument protein <sup>†</sup>     | (Silva et al., 2003;Mocarski Jr, 2007)                                            |
| UL99/pp28 | E <sup>a,b</sup>                      | L (Mocarski Jr, 1996)                                   | <a href="#">F5HI87</a> | (DNA) Replication          | Interaction with UL94 essential for replication                                                            | (Phillips et al., 2012)                                                           |
| UL100     | E <sup>a,b</sup>                      | E/L (Chambers et al., 1999); L (Mocarski Jr, 1996)      | <a href="#">Q6SW43</a> | Entry                      | Virion glycoprotein (gM) <sup>†</sup>                                                                      | (Dunn et al., 2003;Mocarski Jr, 2007)                                             |
| UL100     | E <sup>a,b</sup>                      | E/L (Chambers et al., 1999); L (Mocarski Jr, 1996)      | <a href="#">Q6SW43</a> | Assembly/Maturation/Egress | gM trafficking in virion assembly<br>Virion glycoprotein (gM) <sup>†</sup>                                 | (Krzyzaniak et al., 2007)                                                         |
| UL100     | E <sup>a,b</sup>                      | E/L (Chambers et al., 1999); L (Mocarski Jr, 1996)      | <a href="#">Q6SW43</a> | (DNA) Replication          | Deletion of cytoplasmic tail leads to replication defective virus<br>Virion glycoprotein (gM) <sup>†</sup> | (Krzyzaniak et al., 2007)                                                         |
| UL100     | E <sup>a,b</sup>                      | E/L (Chambers et al., 1999); L (Mocarski Jr, 1996)      | <a href="#">Q6SW43</a> | Virion protein             | Virion glycoprotein (gM) <sup>†</sup>                                                                      | (Dunn et al., 2003;Mocarski Jr, 2007)                                             |
| UL102     | E <sup>a,b</sup>                      | L (Chambers et al., 1999); IE/E (Smith and Pari, 1995b) | <a href="#">F5HIG1</a> | (DNA) Replication          | Component of DNA helicase-primase <sup>†</sup>                                                             | (Smith and Pari, 1995b;Dunn et al., 2003;Apweiler et al., 2004;Mocarski Jr, 2007) |
| UL103     | MGD <sup>a</sup> /<br>GD <sup>b</sup> | L (Chambers et al., 1999)                               | <a href="#">F5HA10</a> | Virion protein             | Tegument protein <sup>†</sup>                                                                              | (Apweiler et al., 2004;Mocarski Jr, 2007)                                         |
| UL103     | MGD <sup>a</sup> /<br>GD <sup>b</sup> | L (Chambers et al., 1999)                               | <a href="#">F5HA10</a> | Assembly/Maturation/Egress | Regulates particle egress                                                                                  | (Mocarski Jr, 2007;Ahlqvist and Mocarski, 2011)                                   |

|        |                  |                                                     |                                                   |                                              |                                                  |                                                                                                                                            |
|--------|------------------|-----------------------------------------------------|---------------------------------------------------|----------------------------------------------|--------------------------------------------------|--------------------------------------------------------------------------------------------------------------------------------------------|
| UL104  | E <sup>a,b</sup> | E (Chambers et al., 1999)                           | <a href="#">F5HBR4</a>                            | Assembly/Maturation/Egress                   | DNA encapsidation <sup>†</sup>                   | (Dunn et al., 2003;Apweiler et al., 2004;Mocarski Jr, 2007)                                                                                |
| UL105  | E <sup>a,b</sup> | L (Chambers et al., 1999)                           | <a href="#">F5HEN8</a>                            | (DNA) Replication                            | Component of DNA helicase-primase <sup>†</sup>   | (Dunn et al., 2003;Apweiler et al., 2004;Mocarski Jr, 2007)                                                                                |
| UL105  | E <sup>a,b</sup> | L (Chambers et al., 1999)                           | <a href="#">F5HEN8</a>                            | Latency*                                     |                                                  | (Goodrum et al., 2002)                                                                                                                     |
| UL108  | MGD <sup>a</sup> | L (Chambers et al., 1999)                           | <a href="#">P16829</a><br><a href="#">(AD169)</a> | Latency*                                     |                                                  | (Goodrum et al., 2002;Cheung et al., 2006)                                                                                                 |
| UL109  | D <sup>a</sup>   | L (Chambers et al., 1999)                           | <a href="#">P16738</a><br><a href="#">(AD169)</a> | Cell tropism/cell type-specific replication* | May be involved in cell tropism epithelial cells | (Womack, 2011)                                                                                                                             |
| UL110  | D <sup>a</sup>   | IE/E/L (Chambers et al., 1999)                      | <a href="#">P16830</a><br><a href="#">(AD169)</a> | Cell tropism/cell type-specific replication* | May be involved in cell tropism epithelial cells | (Womack, 2011)                                                                                                                             |
| UL110  | D <sup>a</sup>   | IE/E/L (Chambers et al., 1999)                      | <a href="#">P16830</a><br><a href="#">(AD169)</a> | Latency*                                     |                                                  | (Goodrum et al., 2002;Cheung et al., 2006)                                                                                                 |
| UL111A | D <sup>a</sup>   | E/L (Chambers et al., 1999); L (Chang et al., 2004) | <a href="#">F5HC71</a>                            | Cell tropism/cell type-specific replication* | May be involved in cell tropism epithelial cells | (Womack, 2011)                                                                                                                             |
| UL111A | D <sup>a</sup>   | E/L (Chambers et al., 1999); L (Chang et al., 2004) | <a href="#">F5HC71</a>                            | Immunomodulation                             | vIL10                                            | (Dunn et al., 2003;Apweiler et al., 2004;Mocarski Jr, 2007;Jenkins et al., 2008;Cheung et al., 2009;Avdic et al., 2011;Avdic et al., 2013) |

|        |                                       |                                                     |                        |                                |                                                                                                                         |                                                                                                  |
|--------|---------------------------------------|-----------------------------------------------------|------------------------|--------------------------------|-------------------------------------------------------------------------------------------------------------------------|--------------------------------------------------------------------------------------------------|
| UL111A | D <sup>a</sup>                        | E/L (Chambers et al., 1999); L (Chang et al., 2004) | <a href="#">F5HC71</a> | Latency                        | Established LAT                                                                                                         | (Cheung et al., 2006; Avdic et al., 2011; Rossetto et al., 2013)                                 |
| UL112  | SGD <sup>a</sup> /<br>GD <sup>b</sup> | E (Mocarski Jr, 1996; Chambers et al., 1999)        | <a href="#">Q6SW37</a> | Gene expression/regulation     | Transcriptional activator <sup>†</sup>                                                                                  | (Mocarski Jr, 2007)                                                                              |
| UL112  | SGD <sup>a</sup> /<br>GD <sup>b</sup> | E (Mocarski Jr, 1996; Chambers et al., 1999)        | <a href="#">Q6SW37</a> | (DNA) Replication              | Organisation of DNA replication <sup>†</sup>                                                                            | (Kim and Ahn, 2010)                                                                              |
| UL113  | SGD <sup>a</sup> /<br>GD <sup>b</sup> | E/L (Chambers et al., 1999); L (Mocarski Jr, 1996)  | <a href="#">Q6SW37</a> | Gene expression/regulation     | Transcriptional activator <sup>†</sup>                                                                                  | (Mocarski Jr, 2007)                                                                              |
| UL113  | SGD <sup>a</sup> /<br>GD <sup>b</sup> | E/L (Chambers et al., 1999); L (Mocarski Jr, 1996)  | <a href="#">Q6SW37</a> | (DNA) Replication              | Promotes DNA replication                                                                                                | (Mocarski Jr, 2007; Kim and Ahn, 2010)                                                           |
| UL114  | MGD <sup>a</sup> /<br>GD <sup>b</sup> | E (Chambers et al., 1999)                           | <a href="#">F5HI85</a> | Nucleotide repair/modification | Uracyl-DNA glycosylase <sup>†</sup>                                                                                     | (Dunn et al., 2003; Apweiler et al., 2004; Mocarski Jr, 2007)                                    |
| UL114  | MGD <sup>a</sup> /<br>GD <sup>b</sup> | E (Chambers et al., 1999)                           | <a href="#">F5HI85</a> | (DNA) Replication              | Increases efficiency of DNA replication<br>Interaction with UL54<br>Temporal regulation of DNA replication <sup>†</sup> | (Prichard et al., 1996; Mocarski Jr, 2007; Ranneberg-Nilsen et al., 2008; Strang and Coen, 2010) |
| UL114  | MGD <sup>a</sup> /<br>GD <sup>b</sup> | E (Chambers et al., 1999)                           | <a href="#">F5HI85</a> | Latency*                       |                                                                                                                         | (Rossetto et al., 2013)                                                                          |
| UL115  | E <sup>a,b</sup>                      | L (Mocarski Jr, 1996)                               | <a href="#">F5HCH8</a> | Virion protein                 | Virion glycoprotein (gL) <sup>†</sup>                                                                                   | (Dunn et al., 2003; Apweiler et al., 2004; Mocarski Jr, 2007)                                    |

|       |                                       |                                                    |                        |                                            |                                                                          |                                                                                   |
|-------|---------------------------------------|----------------------------------------------------|------------------------|--------------------------------------------|--------------------------------------------------------------------------|-----------------------------------------------------------------------------------|
| UL115 | E <sup>a,b</sup>                      | L (Mocarski Jr, 1996)                              | <a href="#">F5HCH8</a> | Entry                                      | Virion glycoprotein (gL) <sup>†</sup>                                    | (Dunn et al., 2003;Apweiler et al., 2004;Mocarski Jr, 2007)                       |
| UL115 | E <sup>a,b</sup>                      | L (Mocarski Jr, 1996)                              | <a href="#">F5HCH8</a> | Latency*                                   |                                                                          | (Cheung et al., 2006)                                                             |
| UL116 | D <sup>a,b</sup>                      | E/L (Chambers et al., 1999); L (Mocarski Jr, 1996) | <a href="#">Q6SW34</a> | Unknown                                    | Putative membrane glycoprotein <sup>†</sup>                              |                                                                                   |
| UL117 | SGD <sup>a</sup> /<br>GD <sup>b</sup> | L (Mocarski Jr, 1996)                              | <a href="#">F5HFA5</a> | (DNA) replication                          | Involved in maturation of viral replication compartments                 | (Qian et al., 2008)                                                               |
| UL118 | D <sup>b</sup>                        | E (Chambers et al., 1999); L (Mocarski Jr, 1996)   | <a href="#">F5HC14</a> | Immunomodulation <sup>(SUL118-UL119)</sup> | Viral Fc Gamma receptor                                                  | (Atalay et al., 2002;Apweiler et al., 2004)                                       |
| UL119 | D <sup>a,b</sup>                      | E (Chambers et al., 1999); L (Mocarski Jr, 1996)   | <a href="#">F5HC14</a> | Immunomodulation <sup>(SUL118-UL119)</sup> | Viral Fc Gamma receptor                                                  | (Dunn et al., 2003;Apweiler et al., 2004;Mocarski Jr, 2007)                       |
| UL120 | D <sup>b</sup>                        | L (Chambers et al., 1999)                          | <a href="#">Q6SW31</a> | Unknown                                    | Putative membrane glycoprotein <sup>†</sup><br>UL120 family <sup>†</sup> |                                                                                   |
| UL121 | D <sup>a,b</sup>                      | L (Chambers et al., 1999)                          | <a href="#">F5HD27</a> | Unknown                                    | Putative membrane glycoprotein <sup>†</sup><br>UL120 family <sup>†</sup> |                                                                                   |
| UL122 | E <sup>a,b</sup>                      | IE/E (Mocarski Jr, 1996;Chambers et al., 1999)     | <a href="#">Q6SW29</a> | Gene expression/regulation                 | Negative regulator<br>MIEP<br>IE2                                        | (Dunn et al., 2003;Apweiler et al., 2004;Mocarski Jr, 2007;Martinez et al., 2014) |

|       |                                       |                                                |                                                     |                                                 |                                                                                                                                               |                                                                                        |
|-------|---------------------------------------|------------------------------------------------|-----------------------------------------------------|-------------------------------------------------|-----------------------------------------------------------------------------------------------------------------------------------------------|----------------------------------------------------------------------------------------|
| UL122 | E <sup>a,b</sup>                      | IE/E (Mocarski Jr, 1996;Chambers et al., 1999) | <a href="#">Q6SW29</a>                              | Latency*                                        | IE2                                                                                                                                           | (Goodrum et al., 2002)                                                                 |
| UL122 | E <sup>a,b</sup>                      | IE/E (Mocarski Jr, 1996;Chambers et al., 1999) | <a href="#">Q6SW29</a>                              | Modulation of host cell cycle/protein synthesis | Repression p53<br>IE2                                                                                                                         | (Apweiler et al., 2004;Kwon et al., 2012)                                              |
| UL123 | SGD <sup>a</sup> /<br>GD <sup>b</sup> | IE (Mocarski Jr, 1996;Chambers et al., 1999)   | <a href="#">F5HCM1</a>                              | Gene expression/regulation                      | Antagonizes histone acetylation and affects nucleosome organization to activate transcription<br>IE1                                          | (Apweiler et al., 2004;Nevels et al., 2004;Mocarski Jr, 2007;Zalckvar et al., 2013)    |
| UL123 | SGD <sup>a</sup> /<br>GD <sup>b</sup> | IE (Mocarski Jr, 1996;Chambers et al., 1999)   | <a href="#">F5HCM1</a>                              | Modulation of host cell cycle/protein synthesis | IE1                                                                                                                                           | (Apweiler et al., 2004)                                                                |
| UL123 | SGD <sup>a</sup> /<br>GD <sup>b</sup> | IE (Mocarski Jr, 1996;Chambers et al., 1999)   | <a href="#">F5HCM1</a>                              | Immunomodulation                                | Inhibition of type I IFN signaling via STAT2<br>Disruption of IL6 signaling via STAT3<br>Elicits a type II IFN-like response via STAT1<br>IE1 | (Apweiler et al., 2004;Paulus et al., 2006;Knoblach et al., 2011;Reitsma et al., 2013) |
| UL123 | SGD <sup>a</sup> /<br>GD <sup>b</sup> | IE (Mocarski Jr, 1996;Chambers et al., 1999)   | <a href="#">F5HCM1</a>                              | Latency*                                        | Binds nucleosomes, role in latency suggested<br>IE1                                                                                           | (Rossetto et al., 2013;Mucke et al., 2014)                                             |
| UL124 | SGD <sup>a</sup> /<br>D <sup>b</sup>  | E (Chambers et al., 1999)                      | <a href="#">F5HHS3</a>                              | Latency*                                        | Membrane glycoprotein<br>†                                                                                                                    | (Goodrum et al., 2002)                                                                 |
| UL125 | N/A                                   | E (Chambers et al., 1999)                      | <a href="#">P16835</a><br>( <a href="#">AD169</a> ) | Latency*                                        |                                                                                                                                               | (Goodrum et al., 2002)                                                                 |

|        |                                      |                             |                                |                                              |                                                                                                                  |                                                                        |
|--------|--------------------------------------|-----------------------------|--------------------------------|----------------------------------------------|------------------------------------------------------------------------------------------------------------------|------------------------------------------------------------------------|
| UL126A | N/A                                  | N/A                         | N/A                            | Latency*                                     |                                                                                                                  | (Rossetto et al., 2013)                                                |
| UL127  | D <sup>a</sup>                       | E (Lashmit et al., 2004)    | <a href="#">P16771 (AD169)</a> | Unknown                                      |                                                                                                                  |                                                                        |
| UL128  | D <sup>b</sup>                       | E (Chambers et al., 1999)   | <a href="#">P16837 (AD169)</a> | Latency*                                     | Putative secreted protein <sup>†</sup>                                                                           | (Goodrum et al., 2002)                                                 |
| UL128  | D <sup>b</sup>                       | E (Chambers et al., 1999)   | <a href="#">P16837 (AD169)</a> | Cell tropism/Cell type-specific replication  | Involved in cell tropism endothelial cells<br>Putative secreted protein <sup>†</sup>                             | (Mocarski Jr, 2007;Ryckman et al., 2008;Stanton et al., 2010)          |
| UL128  | D <sup>b</sup>                       | E (Chambers et al., 1999)   | <a href="#">P16837 (AD169)</a> | Immunomodulation                             | Modulation chemo- and/or cytokines<br>Modulation of monocyte migration<br>Putative secreted protein <sup>†</sup> | (Mocarski Jr, 2007;Straschewski et al., 2011;Zheng et al., 2012)       |
| UL129  | MGD <sup>a</sup>                     | L (Chambers et al., 1999)   | <a href="#">P16838 (AD169)</a> | Unknown                                      |                                                                                                                  |                                                                        |
| UL130  | D <sup>a,b</sup>                     | E/L (Chambers et al., 1999) | <a href="#">F5HCP3</a>         | Cell tropism/Cell type-specific replication  | Involved in cell tropism endothelial and epithelial cells<br>Putative secreted protein <sup>†</sup>              | (Patrone et al., 2005;Ryckman et al., 2008;Stanton et al., 2010)       |
| UL131A | N/A                                  | L (Akter et al., 2003)      | <a href="#">F5HET4</a>         | Virion protein                               | Putative secreted protein <sup>†</sup>                                                                           | (Apweiler et al., 2004)                                                |
| UL131A | N/A                                  | L (Akter et al., 2003)      | <a href="#">F5HET4</a>         | Cell tropism/Cell type-specific replication  | Involved in cell tropism endothelial and epithelial cells<br>Putative secreted protein <sup>†</sup>              | (Schuessler et al., 2008;Stanton et al., 2010;Schuessler et al., 2012) |
| UL132  | MGD <sup>a</sup> /<br>D <sup>b</sup> | E/L (Chambers et al., 1999) | <a href="#">F5HGU6</a>         | Cell tropism/Cell type-specific replication* | May be involved in cell tropism epithelial cells<br>Virion glycoprotein <sup>†</sup>                             | (Womack, 2011)                                                         |

|       |                                      |                                                       |                                |                                                          |                                                                                   |                                                                    |
|-------|--------------------------------------|-------------------------------------------------------|--------------------------------|----------------------------------------------------------|-----------------------------------------------------------------------------------|--------------------------------------------------------------------|
| UL132 | MGD <sup>a</sup> /<br>D <sup>b</sup> | E/L (Chambers et al., 1999)                           | <a href="#">F5HGU6</a>         | Virion protein                                           | Virion glycoprotein <sup>†</sup>                                                  | (Spaderna et al., 2005;Mocarski Jr, 2007)                          |
| UL132 | MGD <sup>a</sup> /<br>D <sup>b</sup> | E/L (Chambers et al., 1999)                           | <a href="#">F5HGU6</a>         | Latency*                                                 | Virion glycoprotein <sup>†</sup>                                                  | (Goodrum et al., 2002)                                             |
| UL133 | N/A                                  | L ? (Bughio et al., 2013)                             | <a href="#">Q6SW10</a>         | Assembly/Maturation/Egress <sup>(SUL</sup><br>133-UL138) | Tegumentation and secondary envelopment<br>Putative membrane protein <sup>†</sup> | (Bughio et al., 2013)                                              |
| UL133 | N/A                                  | L ? (Bughio et al., 2013)                             | <a href="#">Q6SW10</a>         | Latency*                                                 | Putative membrane protein <sup>†</sup>                                            | (Goodrum et al., 2002;Petrucci et al., 2009;Rossetto et al., 2013) |
| UL134 | N/A                                  | L ? (Bughio et al., 2013)                             | <a href="#">Q66M59</a><br>(**) | Assembly/Maturation/Egress <sup>(SUL</sup><br>133-UL138) | Tegumentation and secondary envelopment                                           | (Bughio et al., 2013)                                              |
| UL135 | N/A                                  | L ? (Bughio et al., 2013)                             | <a href="#">F5HAQ7</a>         | Latency*                                                 | Putative secreted protein <sup>†</sup>                                            | (Goodrum et al., 2002;Rossetto et al., 2013)                       |
| UL135 | N/A                                  | L ? (Bughio et al., 2013)                             |                                | Assembly/Maturation/Egress <sup>(SUL</sup><br>133-UL138) | Tegumentation and secondary envelopment<br>Putative secreted protein <sup>†</sup> | (Bughio et al., 2013)                                              |
| UL136 | N/A                                  | L ? (Bughio et al., 2013)                             | <a href="#">F5HF35</a>         | Assembly/Maturation/Egress <sup>(SUL</sup><br>133-UL138) | Tegumentation and secondary envelopment<br>Putative membrane protein <sup>†</sup> | (Bughio et al., 2013)                                              |
| UL138 | N/A                                  | E/L (Petrucci et al., 2009); L? (Bughio et al., 2013) | <a href="#">F5HGQ8</a>         | Assembly/Maturation/Egress <sup>(SUL</sup><br>133-UL138) | Tegumentation and secondary envelopment<br>Putative membrane protein <sup>†</sup> | (Bughio et al., 2013)                                              |



|       |     |                                                       |                        |                   |                                                                                                                        |                                                                                            |
|-------|-----|-------------------------------------------------------|------------------------|-------------------|------------------------------------------------------------------------------------------------------------------------|--------------------------------------------------------------------------------------------|
| UL138 | N/A | E/L (Petrucci et al., 2009); L? (Buglio et al., 2013) | <a href="#">F5HGQ8</a> | Latency           | Established LAT<br>Putative membrane protein <sup>†</sup>                                                              | (Goodrum et al., 2002; Goodrum et al., 2007; Petrucci et al., 2009; Rossetto et al., 2013) |
| UL138 | N/A | E/L (Petrucci et al., 2009); L? (Buglio et al., 2013) | <a href="#">F5HGQ8</a> | Immunomodulation  | Modulation of TNF signaling<br>Putative membrane protein <sup>†</sup>                                                  | (Le et al., 2011; Montag et al., 2011)                                                     |
| UL139 | N/A | E/L (Bradley et al., 2008)                            | <a href="#">Q6SW14</a> | Immunomodulation* | Homology with CD24<br>Putative membrane glycoprotein <sup>†</sup>                                                      | (Qi et al., 2006)                                                                          |
| UL140 | N/A | L (Ma et al., 2013)                                   | <a href="#">F5HCK7</a> | Unknown           | Putative membrane protein <sup>†</sup>                                                                                 |                                                                                            |
| UL141 | N/A | L (Ma et al., 2013)                                   | <a href="#">Q6RJQ3</a> | Immunomodulation  | Modulation of NK cell signaling/function (via TRAIL)<br>Membrane glycoprotein <sup>†</sup><br>UL14 family <sup>†</sup> | (Apweiler et al., 2004; Mocarski Jr, 2007; Prod'homme et al., 2010; Smith et al., 2013)    |
| UL142 | N/A | L (Wills et al., 2005)                                | <a href="#">F5HHH2</a> | Immunomodulation  | MHC-I homologue<br>Putative membrane glycoprotein<br>UL18 family <sup>†</sup>                                          | (Wills et al., 2005; Mocarski Jr, 2007; Ashiru et al., 2009)                               |
| UL144 | N/A | E (Poole et al., 2008)                                | <a href="#">F5HAM0</a> | Immunomodulation  | Modulation of chemo- and/or cytokines                                                                                  | (Poole et al., 2006; Poole et al., 2008)                                                   |
| UL144 | N/A | E (Poole et al., 2008)                                | <a href="#">F5HAM0</a> | Latency           | Established LAT                                                                                                        | (Poole et al., 2013)                                                                       |
| UL145 | N/A | L (Wang et al., 2011); IE (Raftery et al., 2009)      | <a href="#">F5HF44</a> | Latency*          |                                                                                                                        | (Goodrum et al., 2002)                                                                     |

|        |                  |                                                 |                                |                                              |                                                                                                 |                                                                                              |
|--------|------------------|-------------------------------------------------|--------------------------------|----------------------------------------------|-------------------------------------------------------------------------------------------------|----------------------------------------------------------------------------------------------|
| UL146  | D <sup>a</sup>   | E/L (Chambers et al., 1999)(annotated as UL152) | <a href="#">Q6SWX2</a><br>(**) | Immunomodulation                             | vCXCL1 (CXCR1 and CXCR2)<br>Secreted glycoprotein <sup>†</sup><br>UL146 family <sup>†</sup>     | (Dunn et al., 2003;Apweiler et al., 2004;Mocarski Jr, 2007;Luttichau, 2010)                  |
| UL147  | D <sup>a</sup>   | E/L (Chambers et al., 1999)                     | <a href="#">F5HA06</a>         | Immunomodulation*                            | vCXCL2<br>Putative secreted glycoprotein <sup>†</sup><br>UL146 family <sup>†</sup>              | (Dunn et al., 2003;Apweiler et al., 2004;Mocarski Jr, 2007;Heo et al., 2008;Luttichau, 2010) |
| UL147A | N/A              | E/L (Lurain et al., 2006)                       | <a href="#">F5H8R0</a>         | Unknown                                      | Putative membrane protein <sup>†</sup>                                                          |                                                                                              |
| UL148  | N/A              | E/L (Lurain et al., 2006)                       | <a href="#">F5H8Q3</a>         | Cell tropism/Cell type-specific replication* | May be involved in cell tropism epithelial cells<br>Putative membrane glycoprotein <sup>†</sup> | (Womack, 2011)                                                                               |
| UL148A | N/A              | N/A                                             | <a href="#">F5HE74</a>         | Unknown                                      | Putative membrane protein <sup>†</sup>                                                          |                                                                                              |
| UL148B | N/A              | N/A                                             | <a href="#">F5HAK6</a>         | Unknown                                      | Putative membrane protein <sup>†</sup>                                                          |                                                                                              |
| UL148C | N/A              | N/A                                             | <a href="#">F5HDE7</a>         | Unknown                                      | Putative membrane protein <sup>†</sup>                                                          |                                                                                              |
| UL148D | N/A              | N/A                                             | <a href="#">F5HHL7</a>         | Unknown                                      | Putative membrane protein <sup>†</sup>                                                          |                                                                                              |
| UL149  | N/A              | N/A                                             | <a href="#">Q6PMP2</a><br>(**) | Unknown                                      |                                                                                                 |                                                                                              |
| UL150  | N/A              | N/A                                             | <a href="#">Q6SW05</a>         | Latency*                                     | Putative secreted protein <sup>†</sup>                                                          | (Goodrum et al., 2002)                                                                       |
| US1    | D <sup>a,b</sup> | IE (Mocarski Jr, 1996)                          | <a href="#">Q6SW03</a>         | Unknown                                      | US1 family <sup>†</sup>                                                                         |                                                                                              |

|     |                  |                                                 |                        |                   |                                                                                                                           |                                                                                                         |
|-----|------------------|-------------------------------------------------|------------------------|-------------------|---------------------------------------------------------------------------------------------------------------------------|---------------------------------------------------------------------------------------------------------|
| US2 | D <sup>a,b</sup> | IE (Hesse et al., 2013); E (Mocarski Jr, 1996)  | <a href="#">F5HE05</a> | Immunomodulation  | Degradation of MHC-I Membrane glycoprotein <sup>†</sup><br>US2 family <sup>†</sup>                                        | (Oresic et al., 2006; Oresic and Tortorella, 2008; Noriega et al., 2012; Hesse et al., 2013)            |
| US3 | D <sup>a,b</sup> | IE (Mocarski Jr, 1996; Chambers et al., 1999)   | <a href="#">F5HEU0</a> | Immunomodulation  | Degradation of MHC-I Membrane glycoprotein <sup>†</sup><br>US2 family <sup>†</sup>                                        | (Noriega et al., 2012)                                                                                  |
| US6 | D <sup>a,b</sup> | E/L (Jones et al., 1991; Chambers et al., 1999) | <a href="#">Q6SW00</a> | Immunomodulation  | Modulation of T- and NK-cell signaling/function<br>Putative membrane glycoprotein <sup>†</sup><br>US6 family <sup>†</sup> | (Dunn et al., 2003; Apweiler et al., 2004; Mocarski Jr, 2007; Dugan and Hewitt, 2008; Kim et al., 2008) |
| US7 | D <sup>a,b</sup> | E/L (Jones et al., 1991; Chambers et al., 1999) | <a href="#">F5HDD3</a> | Immunomodulation* | US7 is modulated by miRNA<br>Membrane glycoprotein <sup>†</sup><br>US6 family <sup>†</sup>                                | (Apweiler et al., 2004; Tirabassi et al., 2011)                                                         |
| US8 | D <sup>a,b</sup> | E (Jones et al., 1991; Chambers et al., 1999)   | <a href="#">F5HB52</a> | Immunomodulation  | Binds MHC-I <sup>†</sup><br>Membrane glycoprotein <sup>†</sup><br>US6 family <sup>†</sup>                                 | (Dunn et al., 2003; Apweiler et al., 2004; Mocarski Jr, 2007)                                           |
| US9 | D <sup>a,b</sup> | E (Jones et al., 1991; Chambers et al., 1999)   | <a href="#">F5HC33</a> | Immunomodulation* | Membrane glycoprotein <sup>†</sup><br>US6 family <sup>†</sup>                                                             | (Apweiler et al., 2004)                                                                                 |

|      |                                      |                                              |                        |                  |                                                                                                                                  |                                                                                                    |
|------|--------------------------------------|----------------------------------------------|------------------------|------------------|----------------------------------------------------------------------------------------------------------------------------------|----------------------------------------------------------------------------------------------------|
| US9  | D <sup>a,b</sup>                     | E (Jones et al., 1991;Chambers et al., 1999) | <a href="#">F5HC33</a> | Viral spread     | Specifically cell-to-cell transmission in endothelial cells<br>Membrane glycoprotein <sup>†</sup><br><br>US6 family <sup>†</sup> | (Pereira et al., 1995;Mocarski Jr, 2007)                                                           |
| US10 | D <sup>a,b</sup>                     | E (Jones et al., 1991;Chambers et al., 1999) | <a href="#">F5HFJ7</a> | Immunomodulation | Delays MHC-I trafficking <sup>†</sup><br>Membrane glycoprotein <sup>†</sup><br><br>US6 family <sup>†</sup>                       | (Dunn et al., 2003;Apweiler et al., 2004;Mocarski Jr, 2007)                                        |
| US11 | D <sup>a,b</sup>                     | E (Jones et al., 1991;Chambers et al., 1999) | <a href="#">Q6SVZ5</a> | Immunomodulation | Degradation MHC-I <sup>†</sup><br>Membrane glycoprotein <sup>†</sup><br><br>US6 family <sup>†</sup>                              | (Wiertz et al., 1996;Dunn et al., 2003;Apweiler et al., 2004;Mocarski Jr, 2007;Hesse et al., 2013) |
| US12 | D <sup>a,b</sup>                     | E (Chambers et al., 1999)                    | <a href="#">F5HE44</a> | Unknown          | Putative multiple transmembrane protein <sup>†</sup><br><br>US12 family <sup>†</sup>                                             |                                                                                                    |
| US13 | MGD <sup>a</sup> /<br>D <sup>b</sup> | E (Chambers et al., 1999)                    | <a href="#">F5H914</a> | Unknown          | Putative multiple transmembrane protein <sup>†</sup><br><br>US12 family <sup>†</sup>                                             |                                                                                                    |
| US14 | D <sup>a,b</sup>                     | E (Chambers et al., 1999)                    | <a href="#">F5HD92</a> | Unknown          | Putative multiple transmembrane protein <sup>†</sup><br><br>US12 family <sup>†</sup>                                             |                                                                                                    |

|      |                  |                                                    |                        |                                             |                                                                                                                                       |                                           |
|------|------------------|----------------------------------------------------|------------------------|---------------------------------------------|---------------------------------------------------------------------------------------------------------------------------------------|-------------------------------------------|
| US15 | D <sup>a,b</sup> | E/L (Chambers et al., 1999)                        | <a href="#">F5HFH0</a> | Unknown                                     | Putative multiple transmembrane protein<br>†<br>US12 family <sup>†</sup>                                                              |                                           |
| US16 | D <sup>a,b</sup> | E (Chambers et al., 1999)                          | <a href="#">Q6SVZ0</a> | Cell tropism/Cell type-specific replication | Involved in cell tropism epithelial and endothelial cells<br>Putative multiple transmembrane protein<br>†<br>US12 family <sup>†</sup> | (Mocarski Jr, 2007;Bronzini et al., 2012) |
| US17 | D <sup>a,b</sup> | E (Chambers et al., 1999)                          | <a href="#">F5H9N9</a> | Assembly/Maturation/Egress                  | Final virion assembly and egress<br>Putative multiple transmembrane protein<br>†<br>US12 family <sup>†</sup>                          | (Gurczynski et al., 2013)                 |
| US17 | D <sup>a,b</sup> | E (Chambers et al., 1999)                          | <a href="#">F5H9N9</a> | Immunomodulation                            | Controls virion composition to elicit a balanced immune response                                                                      | (Gurczynski et al., 2013)                 |
| US17 | D <sup>a,b</sup> | E (Chambers et al., 1999)                          | <a href="#">F5H9N9</a> | Latency*                                    |                                                                                                                                       | (Rossetto et al., 2013)                   |
| US18 | D <sup>a,b</sup> | E (Chambers et al., 1999); L (Guo and Huang, 1993) | <a href="#">F5HE69</a> | Unknown                                     | Putative multiple transmembrane protein<br>†<br>US12 family <sup>†</sup>                                                              |                                           |
| US19 | D <sup>a,b</sup> | E (Guo and Huang, 1993;Chambers et al., 1999)      | <a href="#">F5HAR3</a> | Viral growth                                | Temperance in epithelial cells<br>Putative multiple transmembrane protein<br>†<br>US12 family <sup>†</sup>                            | (Mocarski Jr, 2007)                       |

|      |                                       |                                               |                                                   |                                              |                                                                                                               |                                           |
|------|---------------------------------------|-----------------------------------------------|---------------------------------------------------|----------------------------------------------|---------------------------------------------------------------------------------------------------------------|-------------------------------------------|
| US20 | D <sup>a,b</sup>                      | E (Guo and Huang, 1993;Chambers et al., 1999) | <a href="#">F5HGH8</a>                            | Unknown                                      | Putative multiple transmembrane protein <sup>†</sup><br>US12 family <sup>†</sup>                              |                                           |
| US21 | D <sup>a,b</sup>                      | N/A                                           | <a href="#">F5HHT6</a>                            | Unknown                                      | Putative multiple transmembrane protein <sup>†</sup><br>US12 family <sup>†</sup>                              |                                           |
| US22 | D <sup>a,b</sup>                      | E (Guo and Huang, 1993;Chambers et al., 1999) | <a href="#">F5HDC7</a>                            | Cell tropism/Cell type-specific replication* | May be involved in cell tropism epithelial cells<br>Tegument protein <sup>†</sup><br>US22 family <sup>†</sup> | (Womack, 2011)                            |
| US22 | D <sup>a,b</sup>                      | E (Guo and Huang, 1993;Chambers et al., 1999) | <a href="#">F5HDC7</a>                            | Virion protein                               | Tegument protein <sup>†</sup><br>US22 family <sup>†</sup>                                                     | (Apweiler et al., 2004;Mocarski Jr, 2007) |
| US23 | MGD <sup>a</sup> /<br>GD <sup>b</sup> | E (Chambers et al., 1999)                     | <a href="#">F5HAZ3</a>                            | Virion protein                               | Tegument protein <sup>†</sup><br>US22 family <sup>†</sup>                                                     | (Apweiler et al., 2004;Mocarski Jr, 2007) |
| US24 | D <sup>a</sup> /GD <sup>b</sup>       | E (Chambers et al., 1999)                     | <a href="#">F5H8S6</a>                            | Virion protein                               | Tegument protein <sup>†</sup><br>US22 family <sup>†</sup>                                                     | (Apweiler et al., 2004;Mocarski Jr, 2007) |
| US24 | D <sup>a</sup> /GD <sup>b</sup>       | E (Chambers et al., 1999)                     | <a href="#">F5H8S6</a>                            | Gene expression/regulation                   | Important for IE, E and L gene expression<br>Tegument protein <sup>†</sup><br>US22 family <sup>†</sup>        | (Feng et al., 2006)                       |
| US25 | D <sup>a,b</sup>                      | E/L (Chambers et al., 1999)                   | <a href="#">P17145</a><br><a href="#">(AD169)</a> | Unknown                                      |                                                                                                               |                                           |
| US26 | SGD <sup>a</sup> /<br>GD <sup>b</sup> | E (Chambers et al., 1999)                     | <a href="#">F5H991</a>                            | Unknown                                      | US22 family <sup>†</sup>                                                                                      |                                           |

|      |                  |                                                    |                        |                                                 |                                                                                                         |                                                                    |
|------|------------------|----------------------------------------------------|------------------------|-------------------------------------------------|---------------------------------------------------------------------------------------------------------|--------------------------------------------------------------------|
| US27 | D <sup>a,b</sup> | E (Chambers et al., 1999); L (Vieira et al., 1998) | <a href="#">F5HDK1</a> | Virion protein                                  | Virion glycoprotein <sup>†</sup><br>GPCR family <sup>†</sup>                                            | (Mocarski Jr, 2007)                                                |
| US27 | D <sup>a,b</sup> | E (Chambers et al., 1999); L (Vieira et al., 1998) | <a href="#">F5HDK1</a> | Cell tropism/Cell type-specific replication     | Deletion virus has growth defect in endothelial cells                                                   | (O'Connor and Shenk, 2011)                                         |
| US27 | D <sup>a,b</sup> | E (Chambers et al., 1999); L (Vieira et al., 1998) | <a href="#">F5HDK1</a> | Viral spread                                    | Involved in viral spread via extracellular route                                                        | (O'Connor and Shenk, 2011)                                         |
| US27 | D <sup>a,b</sup> | E (Chambers et al., 1999); L (Vieira et al., 1998) | <a href="#">F5HDK1</a> | Immunomodulation                                | Modulation of chemo- and/or cytokine receptor                                                           | (Apweiler et al., 2004;Arnolds et al., 2013)                       |
| US27 | D <sup>a,b</sup> | E (Chambers et al., 1999); L (Vieira et al., 1998) | <a href="#">F5HDK1</a> | Modulation of host cell cycle/protein synthesis | Increase in cell proliferation and DNA replication<br>Upregulation pro-survival transcription factors   | (Lares et al., 2013)                                               |
| US28 | D <sup>a,b</sup> | E (Vieira et al., 1998;Chambers et al., 1999)      | <a href="#">F5HF62</a> | Modulation of host cell cycle/protein synthesis | Mediates cellular activation and migration<br>Membrane protein <sup>†</sup><br>GPCR family <sup>†</sup> | (Mocarski Jr, 2007)                                                |
| US28 | D <sup>a,b</sup> | E (Vieira et al., 1998;Chambers et al., 1999)      | <a href="#">F5HF62</a> | Angiogenesis/Tumor formation                    | Promotes angiogenesis and tumor formation<br>Membrane protein <sup>†</sup><br>GPCR family <sup>†</sup>  | (Maussang et al., 2006;Maussang et al., 2009;Slinger et al., 2010) |

|       |                                 |                                               |                                                   |                                              |                                                                                                                            |                                                                |
|-------|---------------------------------|-----------------------------------------------|---------------------------------------------------|----------------------------------------------|----------------------------------------------------------------------------------------------------------------------------|----------------------------------------------------------------|
| US28  | D <sup>a,b</sup>                | E (Vieira et al., 1998;Chambers et al., 1999) | <a href="#">F5HF62</a>                            | Immunomodulation                             | Modulation of chemo- and/or cytokine signaling<br>Membrane protein <sup>†</sup><br>GPCR family <sup>†</sup>                | (Apweiler et al., 2004;Mocarski Jr, 2007;Stropes et al., 2009) |
| US28  | D <sup>a,b</sup>                | E (Vieira et al., 1998;Chambers et al., 1999) | <a href="#">F5HF62</a>                            | Gene expression/regulation                   | Activator of MIEP<br>Membrane protein <sup>†</sup><br>GPCR family <sup>†</sup>                                             | (Wen et al., 2009)                                             |
| US28  | D <sup>a,b</sup>                | E (Vieira et al., 1998;Chambers et al., 1999) | <a href="#">F5HF62</a>                            | Latency*                                     | Transcribed in latently infected THP-1<br>Membrane protein <sup>†</sup><br>GPCR family <sup>†</sup>                        | (Beisser et al., 2002;Goodrum et al., 2002)                    |
| US29  | D <sup>a,b</sup>                | E/L (Chambers et al., 1999)                   | <a href="#">F5HG95</a>                            | Cell tropism/Cell type-specific replication* | May be involved in cell tropism/cell-specific replication endothelial cells<br>Putative membrane glycoprotein <sup>†</sup> | (Mocarski Jr, 2007)                                            |
| US30  | EG <sup>a</sup> /D <sup>b</sup> | E (Chambers et al., 1999)                     | <a href="#">F5HB41</a>                            | Viral growth*                                | May be involved in temperance in fibroblasts <sup>†</sup><br>Putative membrane glycoprotein <sup>†</sup>                   | (Mocarski Jr, 2007)                                            |
| US31  | D <sup>a,b</sup>                | N/A                                           | <a href="#">F5HAM4</a>                            | Unknown                                      | US1 family <sup>†</sup>                                                                                                    |                                                                |
| US32  | D <sup>a,b</sup>                | L (Chambers et al., 1999)                     | <a href="#">F5HD03</a>                            | Latency*                                     | US1 family <sup>†</sup>                                                                                                    | (Goodrum et al., 2002)                                         |
| US33  | D <sup>a</sup>                  | E (Chambers et al., 1999)                     | <a href="#">P09697</a><br><a href="#">(AD169)</a> | Unknown                                      |                                                                                                                            |                                                                |
| US34  | D <sup>a,b</sup>                | E (Chambers et al., 1999)                     | <a href="#">F5HEF3</a>                            | Latency*                                     | Putative secreted protein <sup>†</sup>                                                                                     | (Goodrum et al., 2002)                                         |
| US34A | D <sup>b</sup>                  | N/A                                           | <a href="#">Q6SVX3</a>                            | Unknown                                      | Putative membrane protein <sup>†</sup>                                                                                     |                                                                |



|      |                                       |                                     |                        |                                                    |                                                                                                                                       |                                                                                                                                                              |
|------|---------------------------------------|-------------------------------------|------------------------|----------------------------------------------------|---------------------------------------------------------------------------------------------------------------------------------------|--------------------------------------------------------------------------------------------------------------------------------------------------------------|
| TRS1 | MGD <sup>a</sup> /<br>GD <sup>b</sup> | IE (Blankenship<br>and Shenk, 2002) | <a href="#">Q6SVX2</a> | (DNA) Replication                                  | Association with UL44,<br>essential for replication<br>Tegument protein <sup>†</sup><br>US22 family <sup>†</sup>                      | (Marshall et al.,<br>2009;Strang et al.,<br>2010)                                                                                                            |
| TRS1 | MGD <sup>a</sup> /<br>GD <sup>b</sup> | IE (Blankenship<br>and Shenk, 2002) | <a href="#">Q6SVX2</a> | Gene expression/regulation                         | Activator IE expression<br>Tegument protein <sup>†</sup><br>US22 family <sup>†</sup>                                                  | (Dunn et al.,<br>2003;Mocarski Jr,<br>2007)                                                                                                                  |
| TRS1 | MGD <sup>a</sup> /<br>GD <sup>b</sup> | IE (Blankenship<br>and Shenk, 2002) | <a href="#">Q6SVX2</a> | Assembly/Maturation/Egress                         | Role in integrity of<br>assembly complex<br>Capsid assembly <sup>†</sup><br>Tegument protein <sup>†</sup><br>US22 family <sup>†</sup> | (Dunn et al., 2003)<br>(Blankenship and<br>Shenk,<br>2002;Adamo et al.,<br>2004;Mocarski Jr,<br>2007;Buchkovich et<br>al., 2009)                             |
| TRS1 | MGD <sup>a</sup> /<br>GD <sup>b</sup> | IE (Blankenship<br>and Shenk, 2002) | <a href="#">Q6SVX2</a> | Virion protein                                     | Tegument protein <sup>†</sup><br>US22 family <sup>†</sup>                                                                             | (Dunn et al.,<br>2003;Mocarski Jr,<br>2007)                                                                                                                  |
| TRS1 | MGD <sup>a</sup> /<br>GD <sup>b</sup> | IE (Blankenship<br>and Shenk, 2002) | <a href="#">Q6SVX2</a> | Immunomodulation                                   | Inhibition autophagy<br>Prevents activation<br>RNase L<br>Tegument protein <sup>†</sup><br>US22 family <sup>†</sup>                   | (Apweiler et al.,<br>2004;Child et al.,<br>2004;Chaumorcel et<br>al., 2012)                                                                                  |
| TRS1 | MGD <sup>a</sup> /<br>GD <sup>b</sup> | IE (Blankenship<br>and Shenk, 2002) | <a href="#">Q6SVX2</a> | Modulation of host cell<br>cycle/protein synthesis | Inhibition PKR, block<br>shut down of translation<br>Tegument protein <sup>†</sup><br>US22 family <sup>†</sup>                        | (Apweiler et al.,<br>2004;Cassady,<br>2005;Hakki et al.,<br>2006;Mocarski Jr,<br>2007;Marshall et<br>al., 2009;Child et<br>al., 2012;Bierle et<br>al., 2013) |

|        |                |                                  |                                                   |                                                 |                                                                                                               |                                                                                                                                               |
|--------|----------------|----------------------------------|---------------------------------------------------|-------------------------------------------------|---------------------------------------------------------------------------------------------------------------|-----------------------------------------------------------------------------------------------------------------------------------------------|
| IRS    | D <sup>a</sup> | IE (Blankenship and Shenk, 2002) | <a href="#">Q6SW04</a>                            | (DNA) Replication                               | Association with UL44, essential for replication<br>Tegument protein <sup>†</sup><br>US22 family <sup>†</sup> | (Marshall et al., 2009; Strang et al., 2010)                                                                                                  |
| IRS    | D <sup>a</sup> | IE (Blankenship and Shenk, 2002) | <a href="#">Q6SW04</a>                            | Gene expression/regulation                      | Activator IE expression<br>Tegument protein <sup>†</sup><br>US22 family <sup>†</sup>                          | (Dunn et al., 2003; Mocarski Jr, 2007)                                                                                                        |
| IRS    | D <sup>a</sup> | IE (Blankenship and Shenk, 2002) | <a href="#">Q6SW04</a>                            | Virion protein                                  | Tegument protein <sup>†</sup><br>US22 family <sup>†</sup>                                                     | (Mocarski Jr, 2007)                                                                                                                           |
| IRS    | D <sup>a</sup> | IE (Blankenship and Shenk, 2002) | <a href="#">Q6SW04</a>                            | Modulation of host cell cycle/protein synthesis | Inhibition PKR, block shut down of translation<br>Tegument protein <sup>†</sup><br>US22 family <sup>†</sup>   | (Apweiler et al., 2004; Cassady, 2005; Hakki et al., 2006; Mocarski Jr, 2007; Marshall et al., 2009; Child et al., 2012; Bierle et al., 2013) |
| RNA2.7 | N/A            | E (Wu et al., 1992)              | N/A                                               | Apoptosis                                       | Inhibitor of apoptosis                                                                                        | (Reeves et al., 2007)                                                                                                                         |
| RNA2.7 | N/A            | E (Wu et al., 1992)              | N/A                                               | Latency*                                        |                                                                                                               | (Rossetto et al., 2013)                                                                                                                       |
| RNA1.2 | N/A            | N/A                              | N/A                                               | Unknown                                         |                                                                                                               |                                                                                                                                               |
| RNA4.9 | N/A            | N/A                              | N/A                                               | Latency*                                        |                                                                                                               | (Rossetto et al., 2013)                                                                                                                       |
| RNA4.9 | N/A            | N/A                              | N/A                                               | Gene expression/regulation                      |                                                                                                               | (Rossetto et al., 2013)                                                                                                                       |
| RNA5.0 | N/A            | N/A                              | N/A                                               | Unknown                                         |                                                                                                               |                                                                                                                                               |
| IRL14  | N/A            | N/A                              | <a href="#">P21601</a><br><a href="#">(AD169)</a> | Unknown                                         |                                                                                                               |                                                                                                                                               |

1 Supplementary table 1. Function annotation of the HCMV genome. **Gene:** given are the gene name based on the official gene name in the  
2 internal/terminal repeats (I/TRL), the unique long (UL) and unique short (US) regions. **Growth:** for each gene information is provided if the  
3 gene is essential (E), dispensable (D) or if deletion causes moderate growth defects (MGD), severe growth defects (SGD) or induces a  
4 growth enhancement (EG). These annotations were based on Dunn et al 2003 (a) and Yu et al 2003 (b). Yu et al. 2003 did not differentiate

5 between moderate or severe growth defects and thus growth defects were marked as GD. **Kinetics:** the timing of gene expression in the  
6 temporal cascade of HCMV is provided for each gene. **Key:** immediate-early (IE), early (E), early-late (E/L) or late (L). **Uniprot entry:**  
7 several functional annotations were based on Uniprot entries; the entry number for each gene is given. Only reviewed entries were used and  
8 unless otherwise mentioned between brackets, the entry for HCMV Merlin was used. **Key:** \*\*unreviewed Uniprot entry. **Function keyword:**  
9 every gene (product) was put in a high level functional category which is the function keyword. **Key:** \* indicates a proposed function which  
10 needs further experimental validation; \$ these genes were researched in a cluster e.g. \$UL118-UL119. **Process/protein/gene family:** to  
11 provide more information about the function keyword, also the process in which the gene (product) is involved is briefly described. Further,  
12 if available, information about the protein composition and/or gene family is provided. **Key:** † information provided by Mocarski et al.  
13 2007, unlabeled entries are referenced in the References column; ? † annotated by Mocarski et al. 2007 with a question mark. **References:**  
14 references used for the function keyword and additional information in the process/protein/gene family column
